# Supplementary material for: Halogenated N -phenylpiperazine and 2-(piperazin-1-yl)pyrimidine as novel cucurbit[7]uril guests: experimental and computational insights into supramolecular binding
Source: Royal Society of Chemistry journal article supplement (doi:10.1039/d5ra07259j), 2025-01-01
Supplement: d5ra07259j1.pdf [file d5ra07259j1.pdf]

**Halogenated N-Phenylpiperazine and 2-(Piperazin-1-yl)pyrimidine as Novel Cucurbit[7]uril  
Guests: Experimental and Computational Insights into Supramolecular Binding**

David A. Rincón<sup>1</sup>, Ewelina Zaorska<sup>1</sup> and Maura Malinska<sup>1</sup>

<sup>1</sup>Faculty of Chemistry, University of Warsaw, Pasteura 1, 02-093, Warsaw, Poland

**Supplementary Information**

## Contents

|                                                                                                                                                                                                                                                                                                                                                                                                                                                                |    |
|----------------------------------------------------------------------------------------------------------------------------------------------------------------------------------------------------------------------------------------------------------------------------------------------------------------------------------------------------------------------------------------------------------------------------------------------------------------|----|
| <b>Fig. S1</b> Results of two selected isothermal titration calorimetry (ITC) experiments, showing the raw heat release data and the integrated heat released per injection for the titration of CB7 by Trazodone at 298 K in sodium acetate buffer (pH 3.0). The data points represent the experimental values, while the fitted curve corresponds to the best-fit binding model used for thermodynamic analysis. ....                                        | 6  |
| <b>Fig. S2</b> Results of two selected isothermal titration calorimetry (ITC) experiments, showing the raw heat release data and the integrated heat released per injection for the titration of CB7 by Busiprone at 298 K in sodium acetate buffer (pH 3.0). The data points represent the experimental values, while the fitted curve corresponds to the best-fit binding model used for thermodynamic analysis. ....                                        | 7  |
| <b>Fig. S3</b> Results of two selected isothermal titration calorimetry (ITC) experiments, showing the raw heat release data and the integrated heat released per injection for the titration of CB7 by Aripiprazole at 298 K in sodium acetate buffer (pH 3.0). The data points represent the experimental values, while the fitted curve corresponds to the best-fit binding model used for thermodynamic analysis. ....                                     | 8  |
| <b>Fig. S4</b> Results of two selected isothermal titration calorimetry (ITC) experiments, showing the raw heat release data and the integrated heat released per injection for the titration of CB7 by 1-Phenylpiperazine ( <b>1a</b> ) at 298 K in phosphate-citrate buffer (pH 4.0). The data points represent the experimental values, while the fitted curve corresponds to the best-fit binding model used for thermodynamic analysis. ....              | 9  |
| <b>Fig. S5</b> Results of two selected isothermal titration calorimetry (ITC) experiments, showing the raw heat release data and the integrated heat released per injection for the titration of CB7 by 1-(4-bromophenyl)piperazine ( <b>1b</b> ) at 298 K in phosphate-citrate buffer (pH 4.0). The data points represent the experimental values, while the fitted curve corresponds to the best-fit binding model used for thermodynamic analysis. ....     | 10 |
| <b>Fig. S6</b> Results of two selected isothermal titration calorimetry (ITC) experiments, showing the raw heat release data and the integrated heat released per injection for the titration of CB7 by 1-(4-iodophenyl)piperazine( <b>1c</b> ) at 298 K in phosphate-citrate buffer (pH 4.0). The data points represent the experimental values, while the fitted curve corresponds to the best-fit binding model used for thermodynamic analysis. ....       | 11 |
| <b>Fig. S7</b> Results of two selected isothermal titration calorimetry (ITC) experiments, showing the raw heat release data and the integrated heat released per injection for the titration of CB7 by 1-(3-fluorophenyl)piperazine( <b>1d</b> ) at 298 K in phosphate-citrate buffer (pH 4.0). The data points represent the experimental values, while the fitted curve corresponds to the best-fit binding model used for thermodynamic analysis. ....     | 12 |
| <b>Fig. S8</b> Results of two selected isothermal titration calorimetry (ITC) experiments, showing the raw heat release data and the integrated heat released per injection for the titration of CB7 by 1-(2,3-Dichlorophenyl)piperazine( <b>1e</b> ) at 298 K in phosphate-citrate buffer (pH 4.0). The data points represent the experimental values, while the fitted curve corresponds to the best-fit binding model used for thermodynamic analysis. .... | 13 |
| <b>Fig. S9</b> Results of two selected isothermal titration calorimetry (ITC) experiments, showing the raw heat release data and the integrated heat released per injection for the titration of CB7 by 1-(2,5-Dichlorophenyl)piperazine( <b>1f</b> ) at 298 K in phosphate-citrate buffer (pH 4.0). The data points represent the experimental values, while the fitted curve corresponds to the best-fit binding model used for thermodynamic analysis. .... | 14 |

|                                                                                                                                                                                                                                                                                                                                                                                                                                                                                                                                                                                     |    |
|-------------------------------------------------------------------------------------------------------------------------------------------------------------------------------------------------------------------------------------------------------------------------------------------------------------------------------------------------------------------------------------------------------------------------------------------------------------------------------------------------------------------------------------------------------------------------------------|----|
| <b>Fig. S10</b> Results of two selected isothermal titration calorimetry (ITC) experiments, showing the raw heat release data and the integrated heat released per injection for the titration of CB7 by 1-(3,4-Dichlorophenyl)piperazine( <b>1g</b> ) at 298 K in phosphate-citrate buffer (pH 4.0). The data points represent the experimental values, while the fitted curve corresponds to the best-fit binding model used for thermodynamic analysis. ....                                                                                                                     | 15 |
| <b>Fig. S11</b> Results of two selected isothermal titration calorimetry (ITC) experiments, showing the raw heat release data and the integrated heat released per injection for the titration of CB7 by 1-(2,4-Difluorophenyl)piperazine( <b>1h</b> ) at 298 K in phosphate-citrate buffer (pH 4.0). The data points represent the experimental values, while the fitted curve corresponds to the best-fit binding model used for thermodynamic analysis. ....                                                                                                                     | 16 |
| <b>Fig. S12</b> Results of two selected isothermal titration calorimetry (ITC) experiments, showing the raw heat release data and the integrated heat released per injection for the titration of CB7 by 1-(2-Pyrimidyl)piperazine( <b>2a</b> ) at 298 K in phosphate-citrate buffer (pH 4.0). The data points represent the experimental values, while the fitted curve corresponds to the best-fit binding model used for thermodynamic analysis. ....                                                                                                                            | 17 |
| <b>Fig. S13</b> Results of two selected isothermal titration calorimetry (ITC) experiments, showing the raw heat release data and the integrated heat released per injection for the titration of CB7 by 5-bromo-2-(piperazin-1-yl)pyrimidine( <b>2b</b> ) at 298 K in phosphate-citrate buffer (pH 4.0). The data points represent the experimental values, while the fitted curve corresponds to the best-fit binding model used for thermodynamic analysis. ....                                                                                                                 | 18 |
| <b>Table S1</b> Summary of experiment conditions for Isothermal Titration Calorimetry (ITC )......                                                                                                                                                                                                                                                                                                                                                                                                                                                                                  | 18 |
| <b>Table S2</b> Summary of crystallization conditions. ....                                                                                                                                                                                                                                                                                                                                                                                                                                                                                                                         | 20 |
| <b>Table S3</b> Experimental details for XRD experiments. Experiments were carried out at 100 K. H-atom parameters were constrained.....                                                                                                                                                                                                                                                                                                                                                                                                                                            | 20 |
| <b>Fig. S14</b> Asymmetric unit of <b>1</b> shown in two orientations. (a,c) side view; (b,d) top view. (a,b) Refined model with anisotropic displacement parameters (ADPs) for non-H atoms (H atoms omitted for clarity). (c,d) Residual electron-density (difference-Fourier) maps for the same orientations, contoured at $\pm 0.25 \text{ e } \text{\AA}^{-3}$ (green, $+0.25 \text{ e } \text{\AA}^{-3}$ ; red, $-0.25 \text{ e } \text{\AA}^{-3}$ ). ....                                                                                                                     | 22 |
| <b>Fig. S15</b> Asymmetric unit of <b>2</b> shown in two orientations. (a,c) side view; (b,d) top view. (a,b) Refined model with anisotropic displacement parameters (ADPs) for non-H atoms (H atoms omitted for clarity). (c,d) Residual electron-density (difference-Fourier) maps for the same orientations, contoured at $\pm 0.20 \text{ e } \text{\AA}^{-3}$ (green, $+0.20 \text{ e } \text{\AA}^{-3}$ ; red, $-0.20 \text{ e } \text{\AA}^{-3}$ ). ....                                                                                                                     | 23 |
| <b>Fig. S16</b> Asymmetric unit of <b>3</b> shown in two orientations. (a,c) side view; (b,d) top view. (a,b) Refined model with anisotropic displacement parameters (ADPs) for non-H atoms (H atoms omitted for clarity). (c,d) Residual electron-density (difference-Fourier) maps for the same orientations, contoured at $\pm 0.20 \text{ e } \text{\AA}^{-3}$ (green, $+0.20 \text{ e } \text{\AA}^{-3}$ ; red, $-0.20 \text{ e } \text{\AA}^{-3}$ ). ....                                                                                                                     | 24 |
| <b>Fig. S17</b> Asymmetric unit of <b>4</b> shown in two orientations. (a,c) side view; (b,d) top view. (a,b) Refined model with anisotropic displacement parameters (ADPs) for non-H atoms (H atoms omitted for clarity). (c,d) Residual electron-density (difference-Fourier) maps for the same orientations, contoured at $\pm 0.80 \text{ e } \text{\AA}^{-3}$ (green, $+0.80 \text{ e } \text{\AA}^{-3}$ ; red, $-0.80 \text{ e } \text{\AA}^{-3}$ ). ....                                                                                                                     | 25 |
| <b>Table S4</b> Interaction energies calculated with different density functionals, basis sets and dielectric constants (DC) .....                                                                                                                                                                                                                                                                                                                                                                                                                                                  | 26 |
| <b>Table S5</b> This table presents the various energy terms applicable to a given complex. The energy values for the observed disorder in the position of the ligand in the crystal structure are provided in Table 5. $\Delta E_{\text{Int}}$ is the interaction energy, $\Delta E_{\text{Disp}}$ is the SAPT dispersion energy, T is the temperature, $\Delta S_{\text{APR}}$ is the entropy obtained from APR method, $\Delta E_{\text{Def}}$ is the deformation energy for the host and guest, $\Delta G_{\text{Exp}}$ is the experimental Gibbs free energy obtained from ITC |    |

|                                                                                                                                                                                                                                                                                                                                                                                                                                                                                                                                                                                                                         |    |
|-------------------------------------------------------------------------------------------------------------------------------------------------------------------------------------------------------------------------------------------------------------------------------------------------------------------------------------------------------------------------------------------------------------------------------------------------------------------------------------------------------------------------------------------------------------------------------------------------------------------------|----|
| studies, $\Delta G_{\text{Calcd}}$ is the Hostaš's Gibbs free energy. All the energy values are in [kJ/mol] except T is in [K] and $\Delta S$ in [kJ/mol·K].                                                                                                                                                                                                                                                                                                                                                                                                                                                            | 26 |
| <b>Table S6</b> All SAPT energy components. All units are in [kJ/mol].                                                                                                                                                                                                                                                                                                                                                                                                                                                                                                                                                  | 27 |
| <b>Table S7</b> Thermodynamic parameters for bonding reaction: $\Delta G$ is the Gibbs free energy [kJ / mol], $\Delta H$ is the enthalpy [kJ / mol], T is temperature of 298K, and $\Delta S$ is the entropy [kJ / mol·K] obtained using APR approach.                                                                                                                                                                                                                                                                                                                                                                 | 27 |
| <b>Table S8</b> All these parameters were obtained with molecular dynamics simulations by using APR method. $\Delta G$ is the Gibbs free energy [kJ / mol], $\Delta H$ is the enthalpy [kJ / mol], T is temperature [K] and $\Delta S$ is the entropy [kJ / mol·K].                                                                                                                                                                                                                                                                                                                                                     | 27 |
| <b>Table S9</b> Geometrical parameters, QTAIM properties at the bond critical points (in a.u. $\times 10^3$ ), $E(r_c)$ is in kJ/mol, and classification of all inter- and intramolecular hydrogen bonds. GC is geometric classification, EC corresponds to energy classification and HC stands for Hayashi classification. The number in square brackets corresponds to the glycoluril unit in CB7.                                                                                                                                                                                                                    | 27 |
| <b>Fig. S18</b> Molecular graph for CB7·1h conformer 1. Dashed lines indicate a fluorine interaction. The small green dots indicate the bond critical points. White atoms are hydrogen, gray atoms are carbon, red atoms are oxygen, blue atoms are nitrogen, and green atoms are fluorine.                                                                                                                                                                                                                                                                                                                             | 32 |
| <b>Fig. S19</b> Contour plot of the Laplacian of the electron density for CB7·1h conformer 1. The selected plane is formed between those atoms that belong to the intramolecular bond C2H...FC2'. Regions of charge-concentration and charge-depletion are respectively solid lines in red, $\nabla^2\rho(r_c) < 0$ , and solid lines in blue, $\nabla^2\rho(r_c) > 0$ . Bond paths between each atom pair of two nuclei painted in solid and dashed lines in atom color represent the shared- and closed-shell interactions, respectively, whereas the tiny spheres painted in green represent bond critical points.   | 33 |
| <b>Fig. S20</b> Contour plot of the Laplacian of the electron density for CB7·1h conformer 1. The selected plane is formed between those atoms that belong to the intramolecular bond [O1]3...FC2'. Regions of charge-concentration and charge-depletion are respectively solid lines in red, $\nabla^2\rho(r_c) < 0$ , and solid lines in blue, $\nabla^2\rho(r_c) > 0$ . Bond paths between each atom pair of two nuclei painted in solid and dashed lines in atom color represent the shared- and closed-shell interactions, respectively, whereas the tiny spheres painted in green represent bond critical points. | 33 |
| <b>Fig. S21</b> Contour plot of the Laplacian of the electron density for CB7·1h conformer 1. The selected plane is formed between those atoms that belong to the intramolecular bond [O1]4...FC2'. Regions of charge-concentration and charge-depletion are respectively solid lines in red, $\nabla^2\rho(r_c) < 0$ , and solid lines in blue, $\nabla^2\rho(r_c) > 0$ . Bond paths between each atom pair of two nuclei painted in solid and dashed lines in atom color represent the shared- and closed-shell interactions, respectively, whereas the tiny spheres painted in green represent bond critical points. | 34 |
| <b>Fig. S22</b> Relief maps of the Laplacian of the density for conformer 1 of CB7·1h conformer 1. The selected plane is formed between those atoms that belong to the intramolecular bond C2H...FC2'. The color ranges are: blue, more positive than 1; cyan, between 1 and 0.5; green, between -0.5 and 0.5; yellow, between -1 and -0.5; red, more negative than -1 au.                                                                                                                                                                                                                                              | 35 |
| <b>Fig. S23</b> Relief maps of the Laplacian of the density for conformer 1 of CB7·1h conformer 1. The selected plane is formed between those atoms that belong to the intramolecular bond [O1]3...FC2'. The color ranges are: blue, more positive than 1; cyan, between 1 and 0.5; green, between -0.5 and 0.5; yellow, between -1 and -0.5; red, more negative than -1 au.                                                                                                                                                                                                                                            | 35 |
| <b>Fig. S24</b> Relief maps of the Laplacian of the density for conformer 1 of CB7·1h conformer 1. The selected plane is formed between those atoms that belong to the intramolecular bond [O1]4...FC2'. The color ranges are: blue, more positive than 1; cyan, between 1 and 0.5; green, between -0.5 and 0.5; yellow, between -1 and -0.5; red, more negative than -1 au.                                                                                                                                                                                                                                            | 36 |

|                                                                                                                                                                                                                                                                                                                                                                    |    |
|--------------------------------------------------------------------------------------------------------------------------------------------------------------------------------------------------------------------------------------------------------------------------------------------------------------------------------------------------------------------|----|
| <b>Table S10</b> Geometrical parameters, QTAIM properties at the bond critical points (in a.u. $\times 10^3$ ), $E(r_c)$ is in kJ/mol, and classification of $n \rightarrow \pi^*$ interactions. EC corresponds to energy classification and HC stands for Hayashi classification. The number in square brackets corresponds to the glycolurill unit in CB7· ..... | 36 |
| <b>Fig. S25</b> Experimental enthalpy energy (Table 2) versus interaction energy. The equation for the adjusted tendency (Continuous line) is $y = 0.2295 x + 24.8810$ and $R^2=0.80$ .....                                                                                                                                                                        | 38 |
| <b>Fig. S26</b> Potential energy surfaces for the dihedral angle C2'-C1'-N1-C1 are shown for 1i in (●) and 1j in (●) with the structures at the minima overlaid.....                                                                                                                                                                                               | 39 |

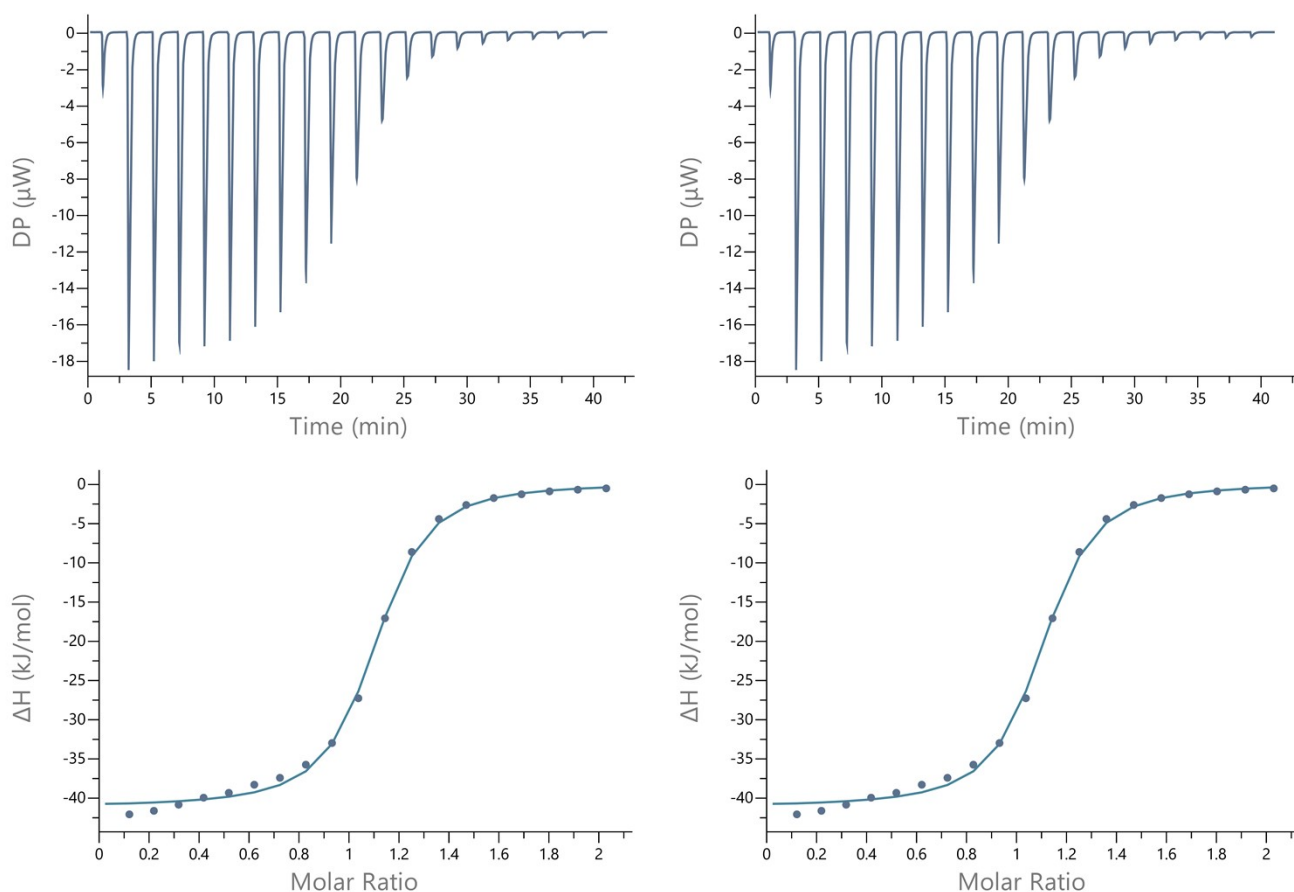

**Fig. S1** Results of two selected isothermal titration calorimetry (ITC) experiments, showing the raw heat release data and the integrated heat released per injection for the titration of CB7 by Trazodone at 298 K in sodium acetate buffer (pH 3.0). The data points represent the experimental values, while the fitted curve corresponds to the best-fit binding model used for thermodynamic analysis.

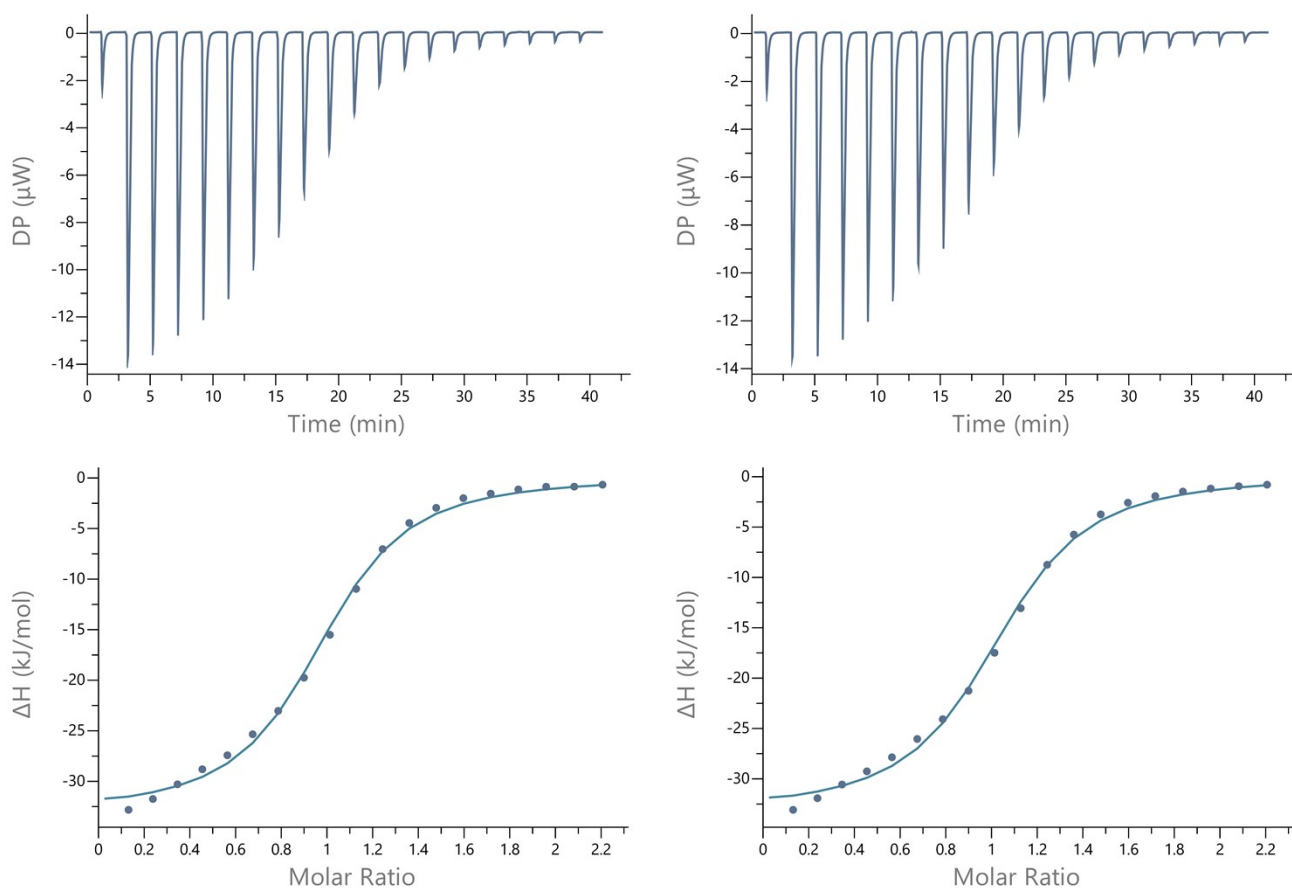

**Fig. S2** Results of two selected isothermal titration calorimetry (ITC) experiments, showing the raw heat release data and the integrated heat released per injection for the titration of CB7 by Busiprone at 298 K in sodium acetate buffer (pH 3.0). The data points represent the experimental values, while the fitted curve corresponds to the best-fit binding model used for thermodynamic analysis.

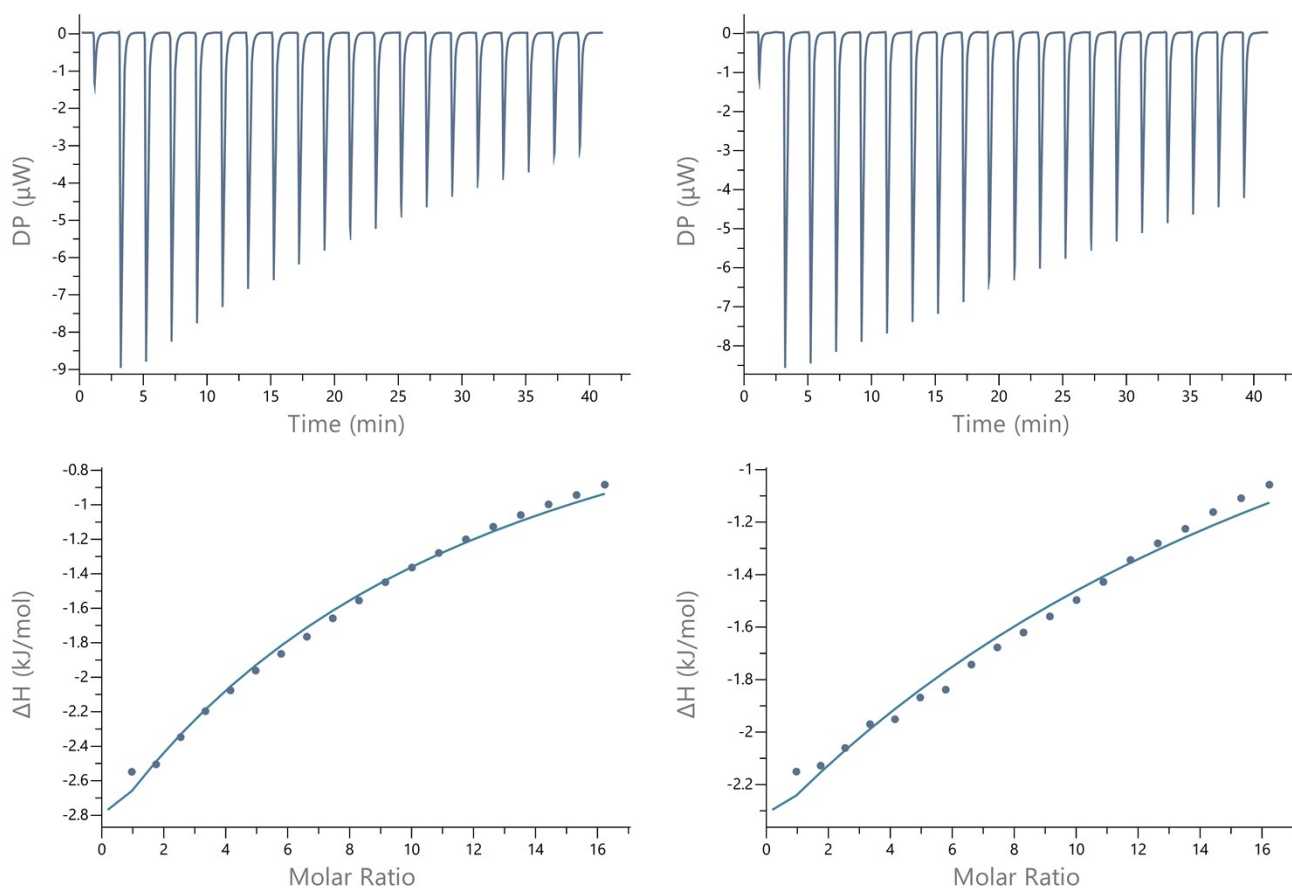

**Fig. S3** Results of two selected isothermal titration calorimetry (ITC) experiments, showing the raw heat release data and the integrated heat released per injection for the titration of CB7 by Aripiprazole at 298 K in sodium acetate buffer (pH 3.0). The data points represent the experimental values, while the fitted curve corresponds to the best-fit binding model used for thermodynamic analysis.



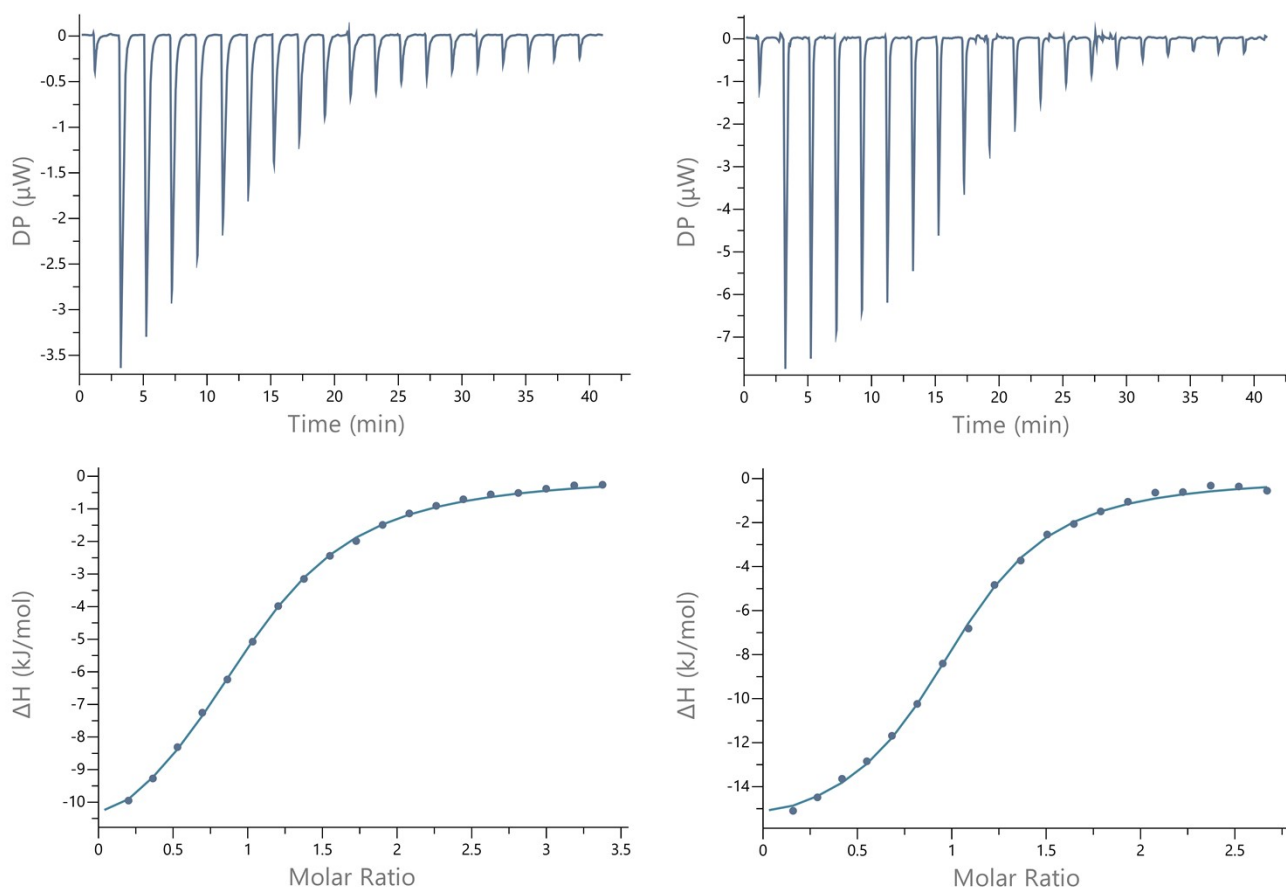

**Fig. S4** Results of two selected isothermal titration calorimetry (ITC) experiments, showing the raw heat release data and the integrated heat released per injection for the titration of CB7 by 1-Phenylpiperazine (**1a**) at 298 K in phosphate-citrate buffer (pH 4.0). The data points represent the experimental values, while the fitted curve corresponds to the best-fit binding model used for thermodynamic analysis.

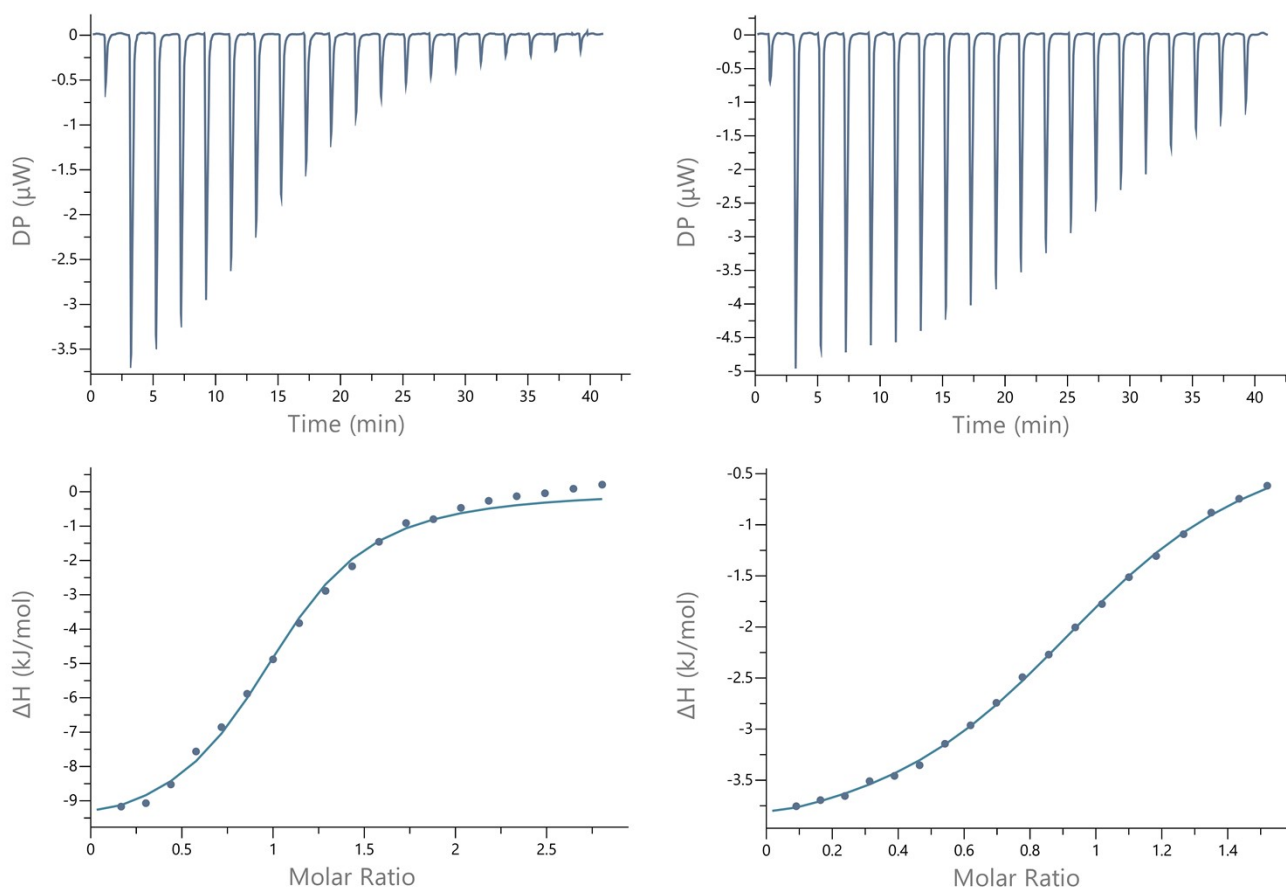

**Fig. S5** Results of two selected isothermal titration calorimetry (ITC) experiments, showing the raw heat release data and the integrated heat released per injection for the titration of CB7 by 1-(4-bromophenyl)piperazine (**1b**) at 298 K in phosphate-citrate buffer (pH 4.0). The data points represent the experimental values, while the fitted curve corresponds to the best-fit binding model used for thermodynamic analysis.

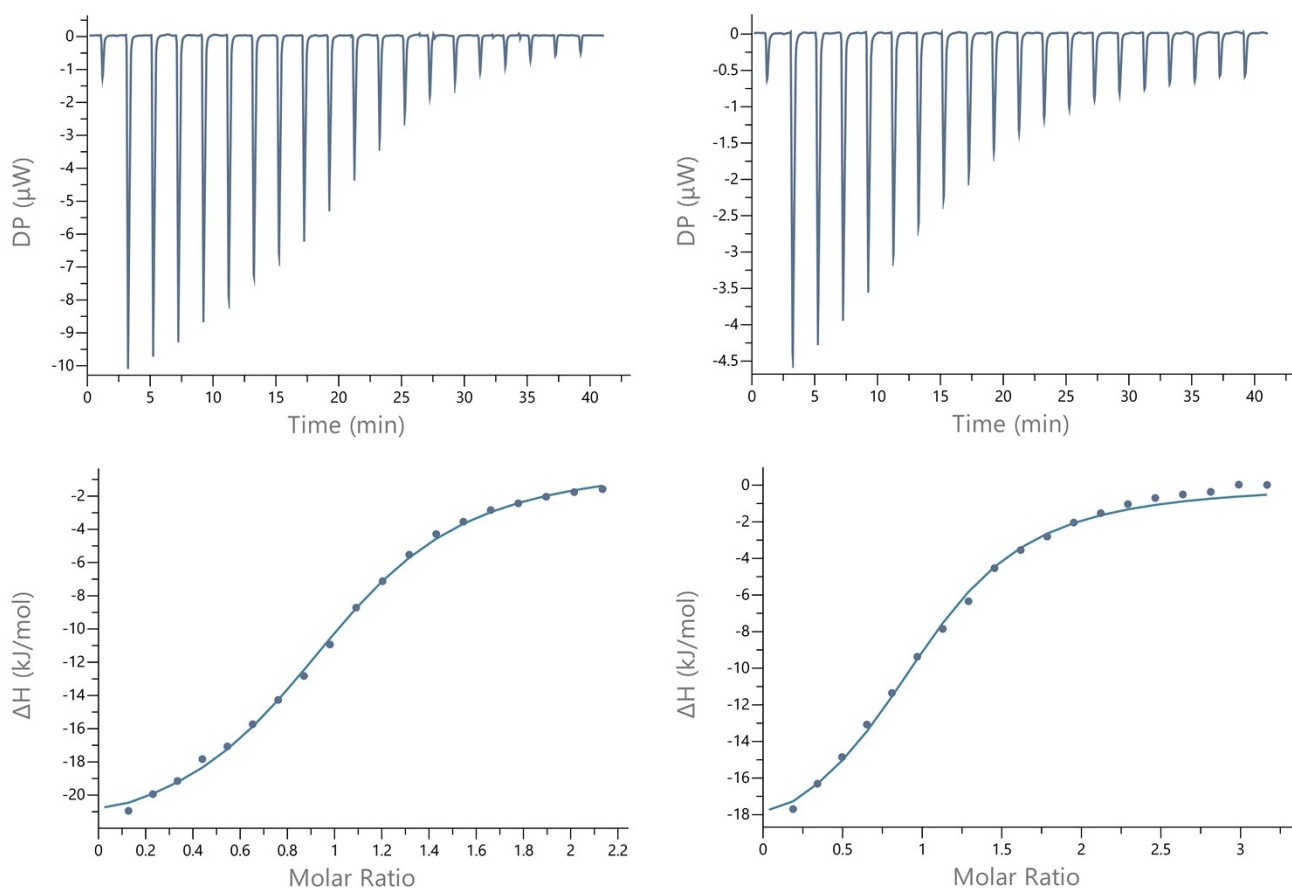

**Fig. S6** Results of two selected isothermal titration calorimetry (ITC) experiments, showing the raw heat release data and the integrated heat released per injection for the titration of CB7 by 1-(4-iodophenyl)piperazine(**1c**) at 298 K in phosphate-citrate buffer (pH 4.0). The data points represent the experimental values, while the fitted curve corresponds to the best-fit binding model used for thermodynamic analysis.

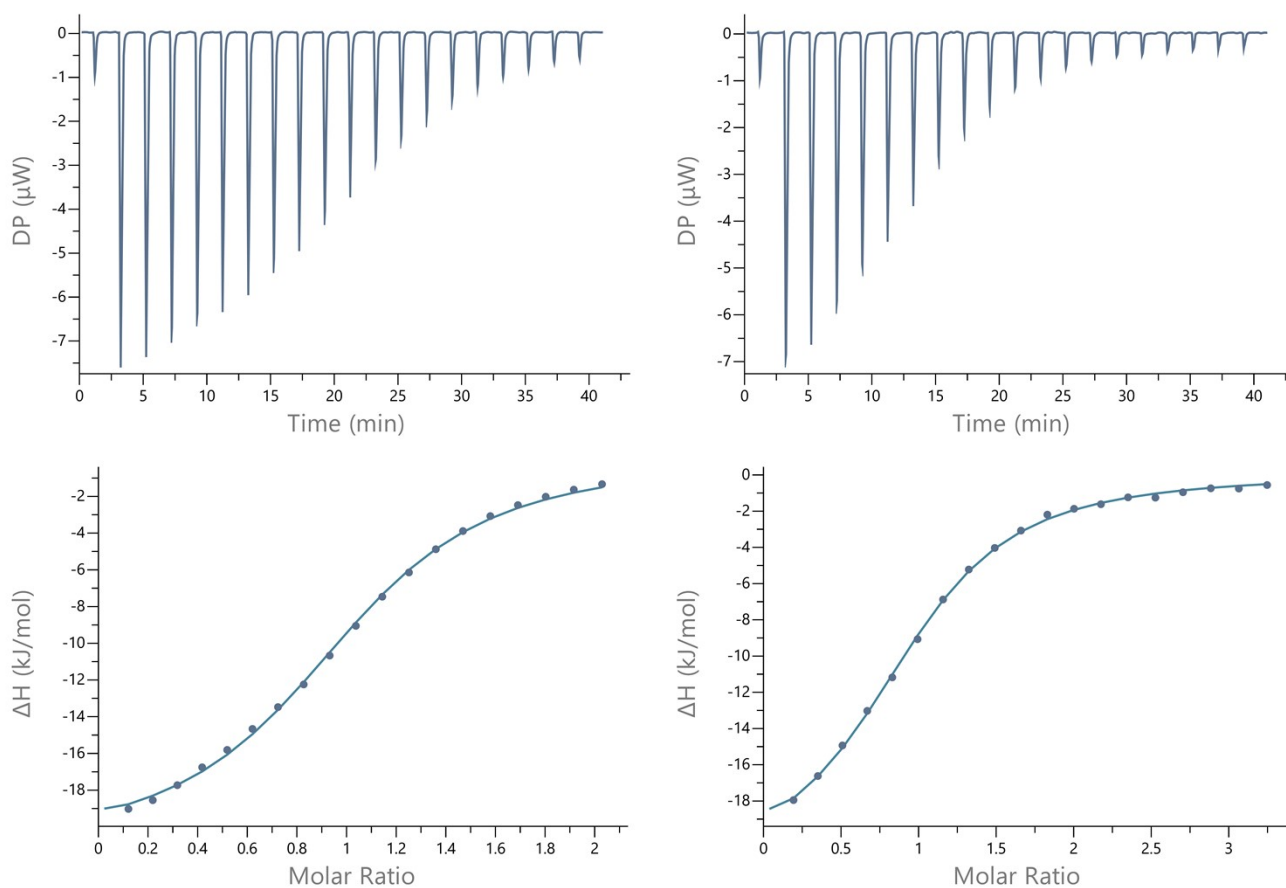

**Fig. S7** Results of two selected isothermal titration calorimetry (ITC) experiments, showing the raw heat release data and the integrated heat released per injection for the titration of CB7 by 1-(3-fluorophenyl)piperazine(**1d**) at 298 K in phosphate-citrate buffer (pH 4.0). The data points represent the experimental values, while the fitted curve corresponds to the best-fit binding model used for thermodynamic analysis.

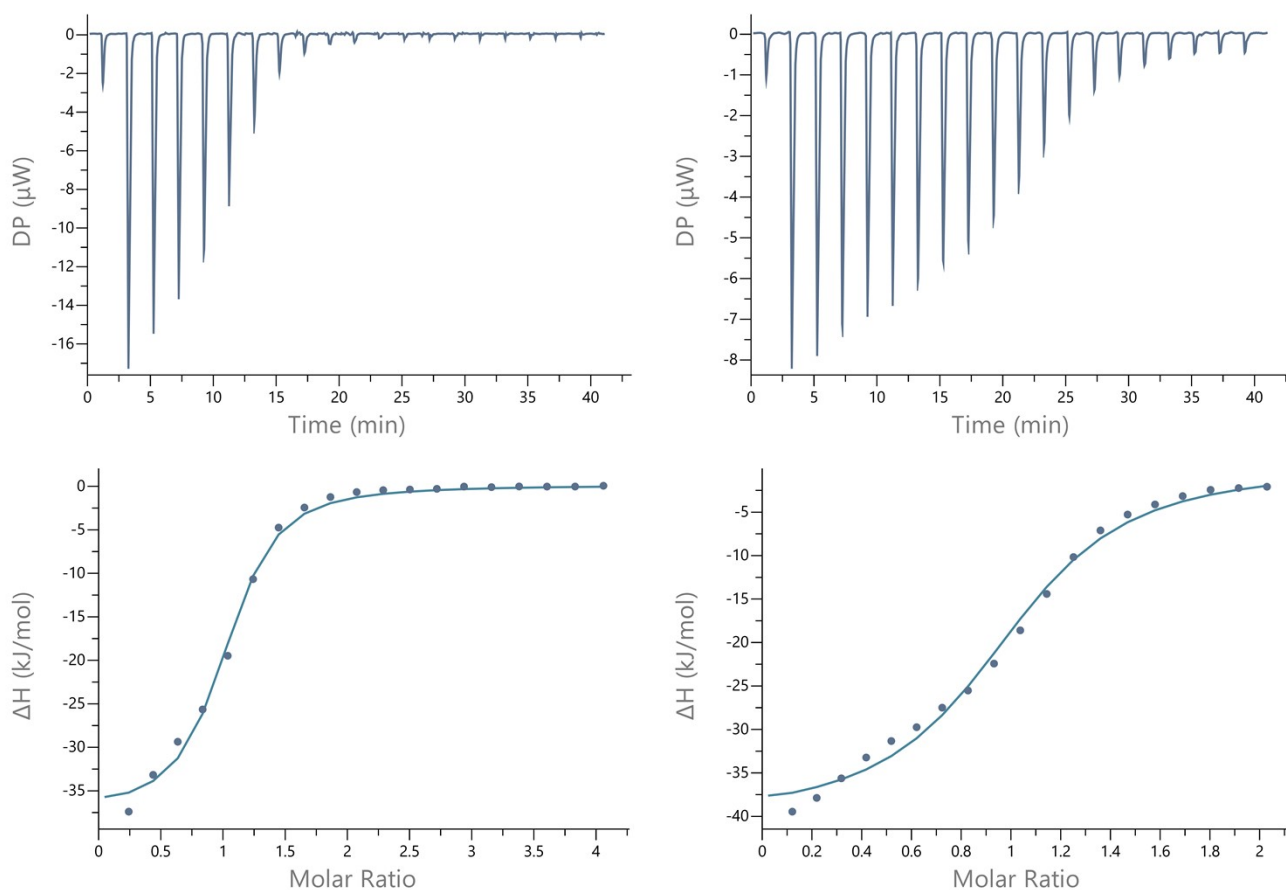

**Fig. S8** Results of two selected isothermal titration calorimetry (ITC) experiments, showing the raw heat release data and the integrated heat released per injection for the titration of CB7 by 1-(2,3-Dichlorophenyl)piperazine(**1e**) at 298 K in phosphate-citrate buffer (pH 4.0). The data points represent the experimental values, while the fitted curve corresponds to the best-fit binding model used for thermodynamic analysis.

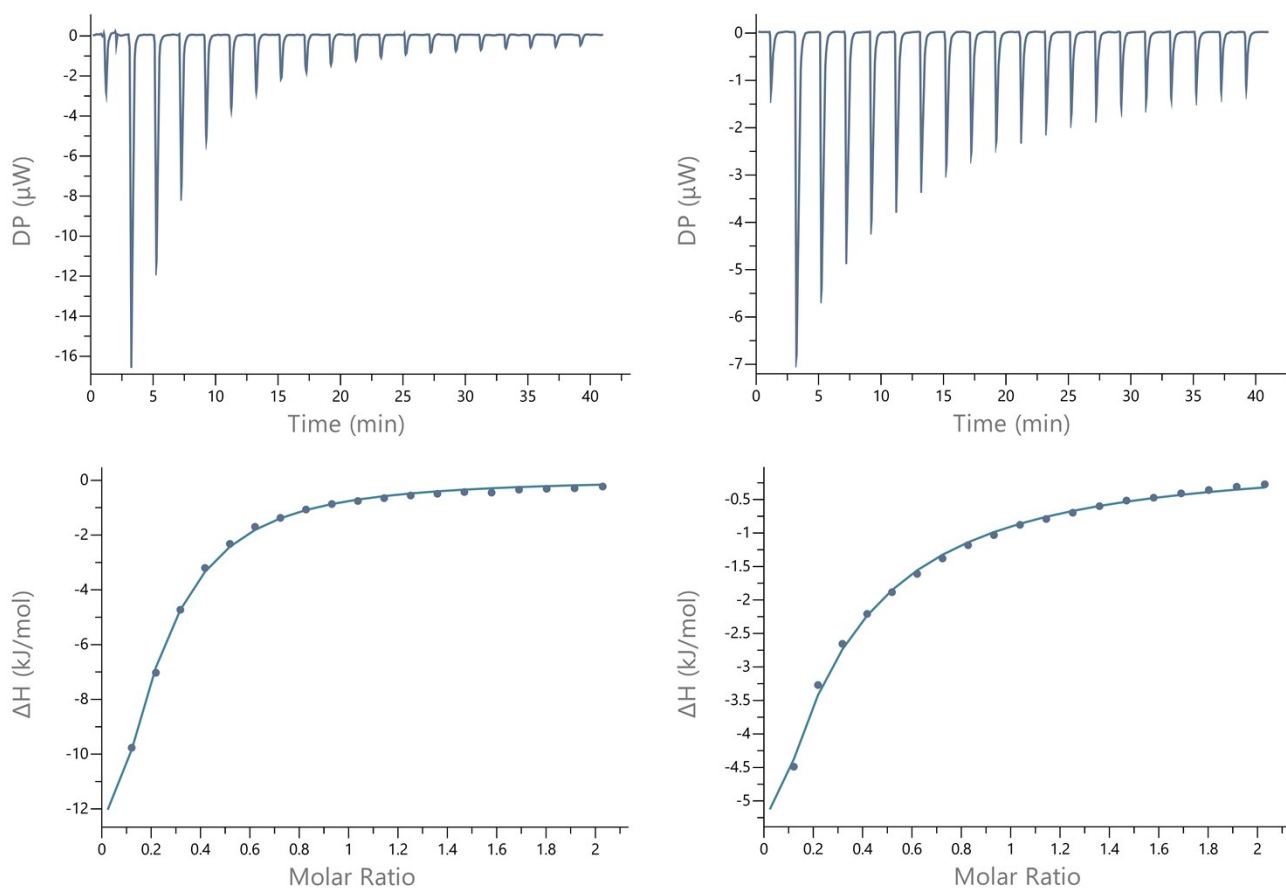

**Fig. S9** Results of two selected isothermal titration calorimetry (ITC) experiments, showing the raw heat release data and the integrated heat released per injection for the titration of CB7 by 1-(2,5-Dichlorophenyl)piperazine(**1f**) at 298 K in phosphate-citrate buffer (pH 4.0). The data points represent the experimental values, while the fitted curve corresponds to the best-fit binding model used for thermodynamic analysis.

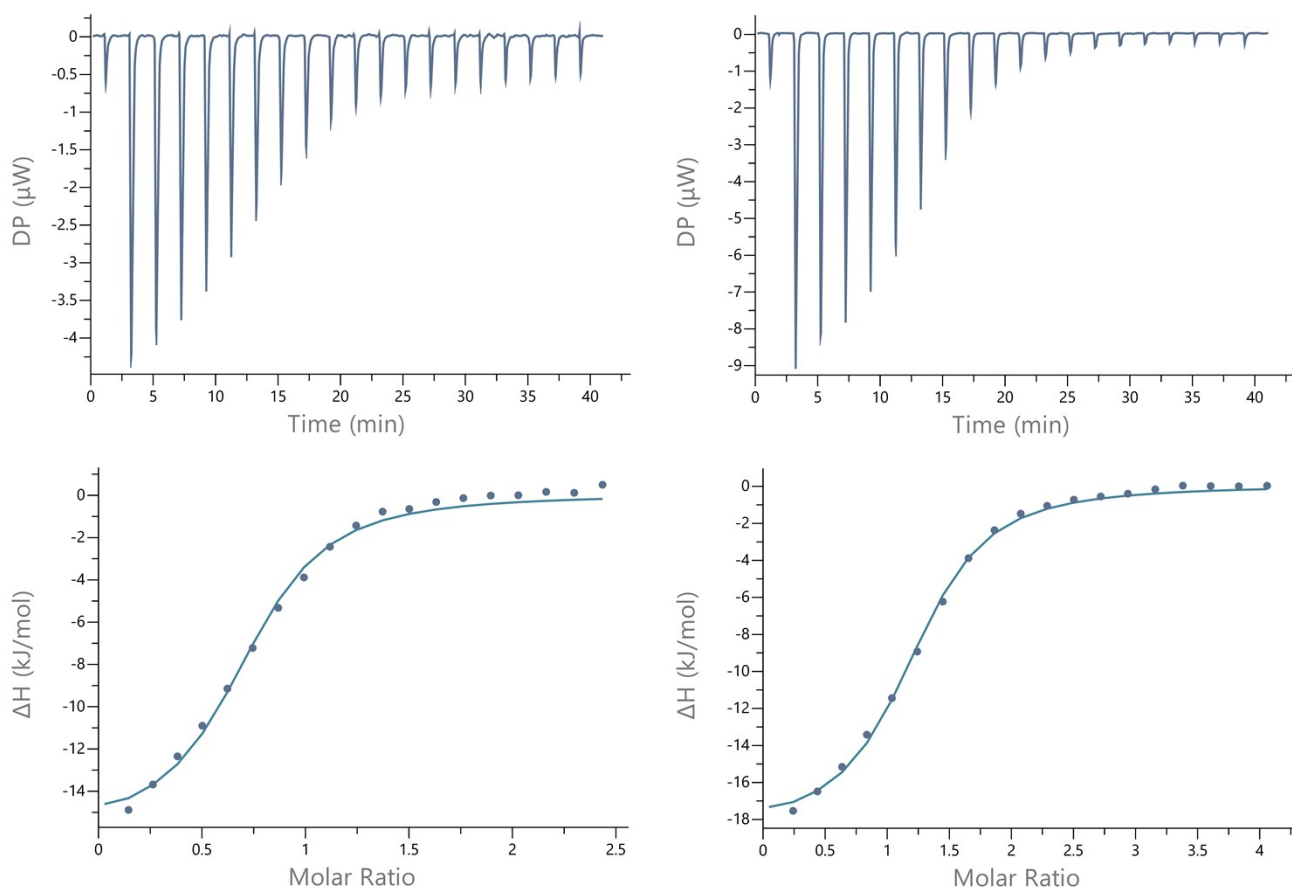

**Fig. S10** Results of two selected isothermal titration calorimetry (ITC) experiments, showing the raw heat release data and the integrated heat released per injection for the titration of CB7 by 1-(3,4-Dichlorophenyl)piperazine(**1g**) at 298 K in phosphate-citrate buffer (pH 4.0). The data points represent the experimental values, while the fitted curve corresponds to the best-fit binding model used for thermodynamic analysis.

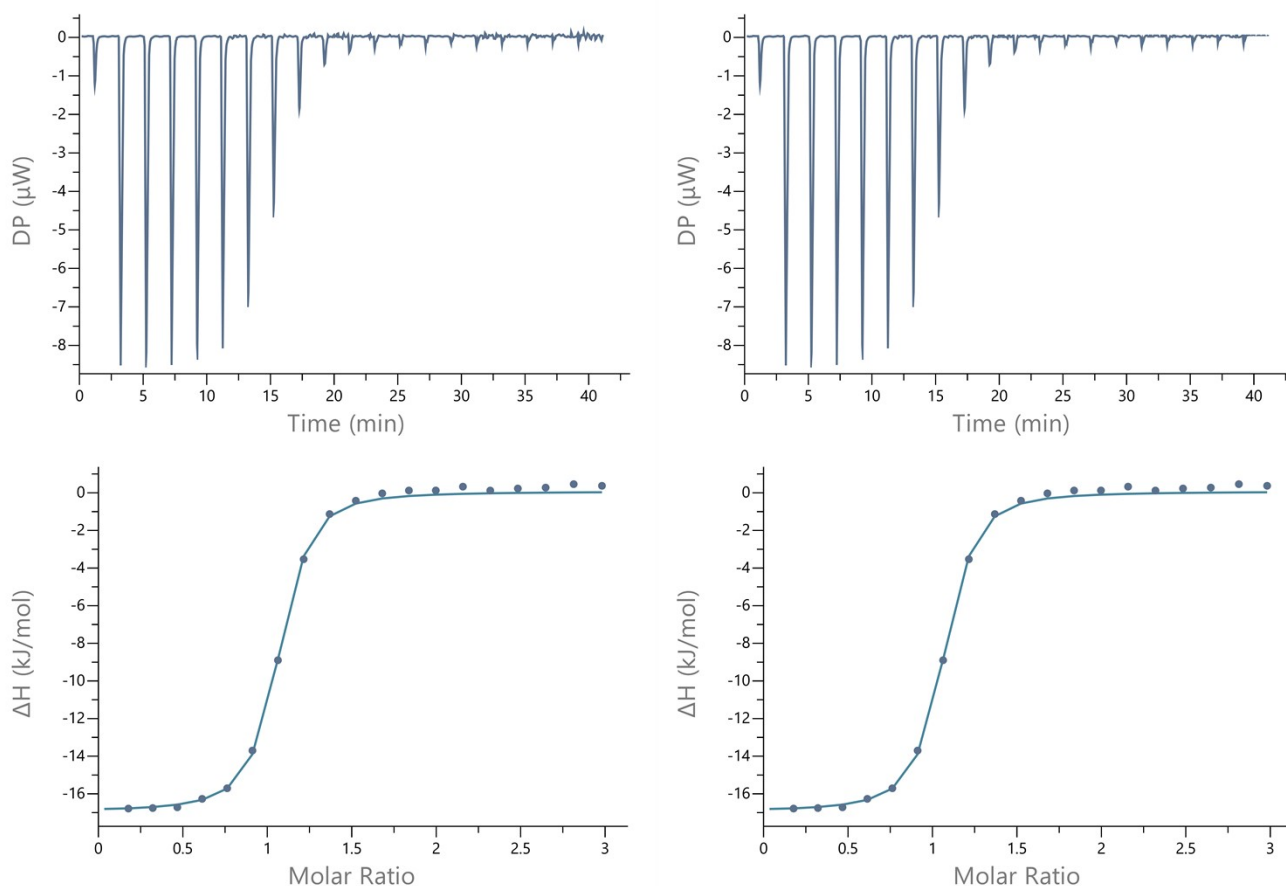

**Fig. S11** Results of two selected isothermal titration calorimetry (ITC) experiments, showing the raw heat release data and the integrated heat released per injection for the titration of CB7 by 1-(2,4-Difluorophenyl)piperazine(**1h**) at 298 K in phosphate-citrate buffer (pH 4.0). The data points represent the experimental values, while the fitted curve corresponds to the best-fit binding model used for thermodynamic analysis.



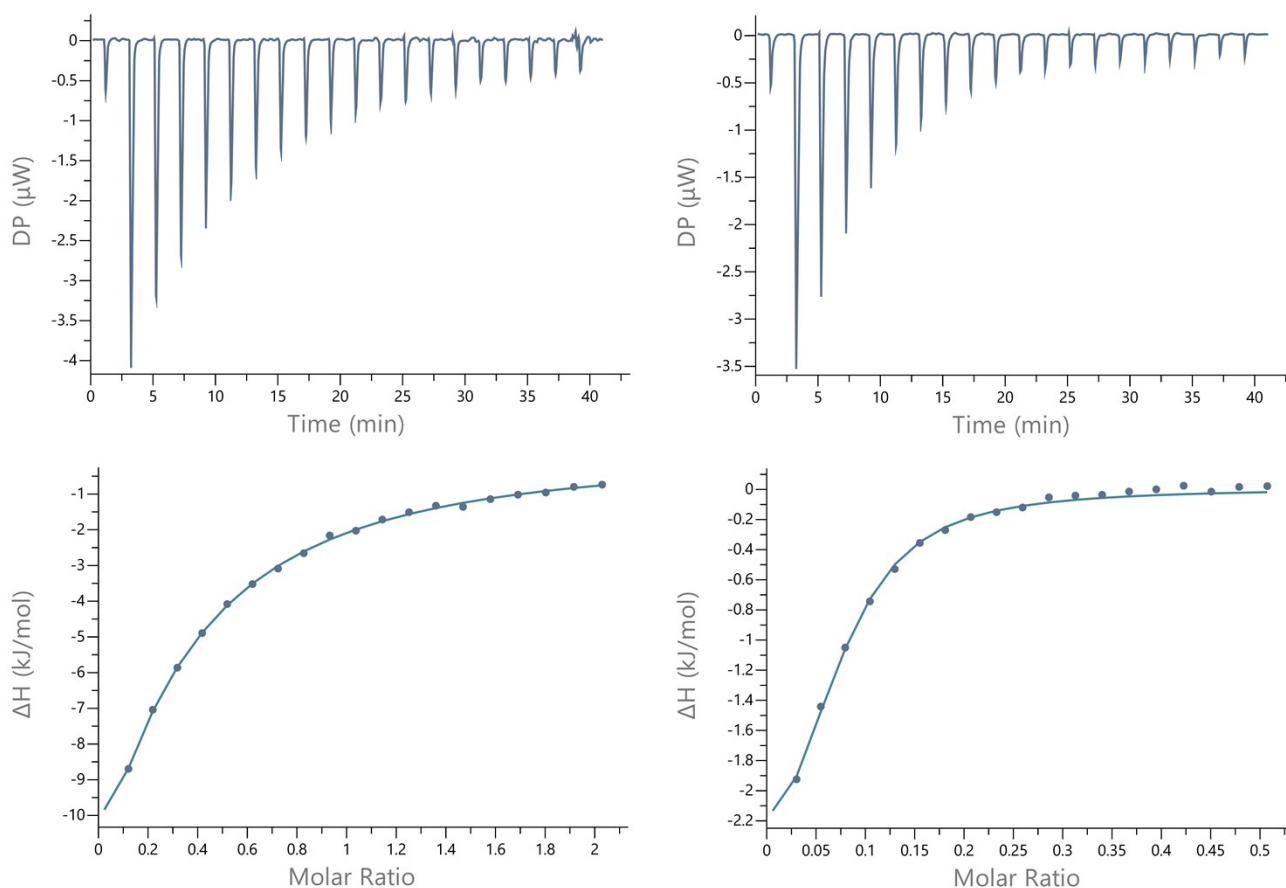

**Fig. S12** Results of two selected isothermal titration calorimetry (ITC) experiments, showing the raw heat release data and the integrated heat released per injection for the titration of CB7 by 1-(2-Pyrimidyl)piperazine(**2a**) at 298 K in phosphate-citrate buffer (pH 4.0). The data points represent the experimental values, while the fitted curve corresponds to the best-fit binding model used for thermodynamic analysis.

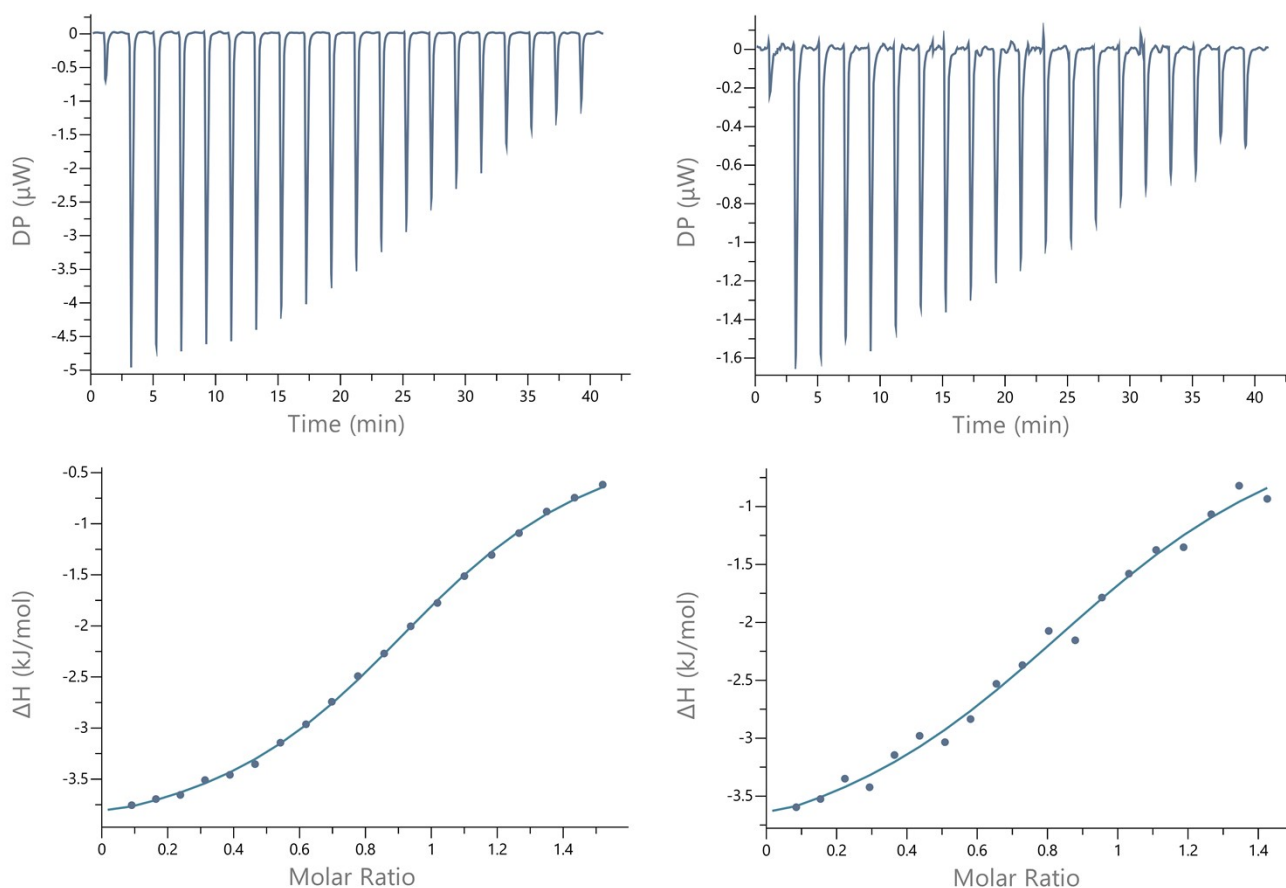

**Fig. S13** Results of two selected isothermal titration calorimetry (ITC) experiments, showing the raw heat release data and the integrated heat released per injection for the titration of CB7 by 5-bromo-2-(piperazin-1-yl)pyrimidine(**2b**) at 298 K in phosphate-citrate buffer (pH 4.0). The data points represent the experimental values, while the fitted curve corresponds to the best-fit binding model used for thermodynamic analysis.

**Table S1** Summary of experiment conditions for Isothermal Titration Calorimetry (ITC ).

| Entry | Cucurbit<br>[7] uril<br>(mM) | Phenylpiperazine<br>derivatives | Phenylpiperazine<br>derivatives (mM) | Buffer                | pH  | Temperature<br>(°C) |
|-------|------------------------------|---------------------------------|--------------------------------------|-----------------------|-----|---------------------|
| 1.    | 0.25                         | <b>1a</b>                       | 2.5                                  | Phosphate-<br>Citrate | 4.0 | 25                  |
|       | 0.25                         |                                 | 2.5                                  |                       |     |                     |
| 2.    | 1.0                          | <b>2a</b>                       | 5.0                                  | Phosphate-<br>Citrate | 4.0 | 25                  |
|       | 2.0                          |                                 | 10.0                                 |                       |     |                     |

| Entry | Cucurbit<br>[7] uril<br>(mM) | Phenylpiperazine<br>derivatives | Phenylpiperazine<br>derivatives (mM) | Buffer                | pH  | Temperature<br>(°C) |
|-------|------------------------------|---------------------------------|--------------------------------------|-----------------------|-----|---------------------|
|       | 4.0                          |                                 | 10.0                                 |                       |     |                     |
|       | 4.0                          |                                 | 15.0                                 |                       |     |                     |
|       | 4.0                          |                                 | 30.0                                 |                       |     |                     |
| 3.    | 0.5                          | <b>1b</b>                       | 2.0                                  | Phosphate-<br>Citrate | 4.0 | 25                  |
|       | 0.5                          |                                 | 2.5                                  |                       |     |                     |
|       | 1.5                          |                                 | 2.5                                  |                       |     |                     |
| 4.    | 0.25                         | <b>1c</b>                       | 2.5                                  | Phosphate-<br>Citrate | 4.0 | 25                  |
|       | 0.5                          |                                 | 1.25                                 |                       |     |                     |
|       | 1.5                          |                                 | 2.5                                  |                       |     |                     |
| 5.    | 0.25                         | <b>1e</b>                       | 1.25                                 | Phosphate-<br>Citrate | 4.0 | 25                  |
|       | 0.25                         |                                 | 2.5                                  |                       |     |                     |
|       | 0.5                          |                                 | 2.5                                  |                       |     |                     |
| 6.    | 0.25                         | <b>1g</b>                       | 1.5                                  | Phosphate-<br>Citrate | 4.0 | 25                  |
|       | 0.25                         |                                 | 2.5                                  |                       |     |                     |
|       | 0.5                          |                                 | 2.5                                  |                       |     |                     |
| 7.    | 0.25                         | <b>1f</b>                       | 2.5                                  | Phosphate-<br>Citrate | 4.0 | 25                  |
|       | 1.0                          |                                 | 2.0                                  |                       |     |                     |
|       | 2.0                          |                                 | 10.0                                 |                       |     |                     |
| 8.    | 0.25                         | <b>1d</b>                       | 2.5                                  | Phosphate-<br>Citrate |     | 25                  |
|       | 0.5                          |                                 | 2.0                                  |                       |     |                     |
|       | 1.0                          |                                 | 2.0                                  |                       |     |                     |
| 9.    | 0.25                         | <b>1h</b>                       | 2.5                                  | Phosphate-<br>Citrate | 4.0 | 25                  |
| 10.   | 0.25                         | <b>1i</b>                       | 2.5                                  | Phosphate-<br>Citrate | 4.0 | 25                  |
| 12.   | 0.5                          | <b>2b</b>                       | 5.0                                  | Phosphate-<br>Citrate | 4.0 | 25                  |
|       | 0.5                          |                                 | 7.5                                  |                       |     |                     |

**Table S2** Summary of crystallization conditions.

| Entry                                                                              | Host  | Ligand                                              | Ligand / Host ratio | Solvent                        | pH | Temperature (°C) |
|------------------------------------------------------------------------------------|-------|-----------------------------------------------------|---------------------|--------------------------------|----|------------------|
| 1.                                                                                 | CB[7] | 1-Phenylpiperazine ( <b>1a</b> )                    | 1:4                 | H <sub>2</sub> SO <sub>4</sub> | 2  | 25               |
| 2.                                                                                 | CB[7] | 1-(2,4-difluorophenyl)piperazine ( <b>1f</b> )      | 1:4                 | H <sub>2</sub> SO <sub>4</sub> | 4  | 25               |
| 3.                                                                                 | CB[7] | 1-(4-chloro-2-fluorophenyl)piperazine ( <b>1i</b> ) | 1:4                 | H <sub>2</sub> SO <sub>4</sub> | 2  | 25               |
| 4.                                                                                 | CB[7] | 1-(2-Pyrimidyl)piperazine ( <b>2a</b> )             | 1:4                 | H <sub>2</sub> SO <sub>4</sub> | 4  | 25               |
| <sup>a</sup> Reaction conditions: Cucurbit [7] uril (CB[7], 0.007 mmol, 1 equiv.). |       |                                                     |                     |                                |    |                  |

**Table S3** Experimental details for XRD experiments. Experiments were carried out at 100 K. H-atom parameters were constrained.

|                                    | (1)                                                                                                                                                                      | (2)                                                                                                                                                        | (3)                                                                                                                                                       | (4)                                                                                                                                                   |
|------------------------------------|--------------------------------------------------------------------------------------------------------------------------------------------------------------------------|------------------------------------------------------------------------------------------------------------------------------------------------------------|-----------------------------------------------------------------------------------------------------------------------------------------------------------|-------------------------------------------------------------------------------------------------------------------------------------------------------|
| Crystal data                       |                                                                                                                                                                          |                                                                                                                                                            |                                                                                                                                                           |                                                                                                                                                       |
| Chemical formula                   | C <sub>42</sub> H <sub>42</sub> N <sub>28</sub> O <sub>14</sub> ·2(H <sub>2</sub> O)·C <sub>10</sub> H <sub>11</sub> <sub>5</sub> N <sub>2</sub> ·O·19[H <sub>2</sub> O] | 2(Cl)·C <sub>42</sub> H <sub>42</sub> N <sub>28</sub> O <sub>14</sub> ·C <sub>10</sub> H <sub>13</sub> F <sub>2</sub> N <sub>2</sub> ·16[H <sub>2</sub> O] | C <sub>10</sub> H <sub>13</sub> ClFN <sub>2</sub> ·1.5(C <sub>42</sub> H <sub>42</sub> N <sub>2</sub> <sub>8</sub> O <sub>14</sub> )·53[H <sub>2</sub> O] | C <sub>42</sub> H <sub>42</sub> N <sub>28</sub> Na <sub>3.5</sub> O <sub>27</sub> ·C <sub>8</sub> H <sub>13</sub> N <sub>4</sub> ·8[H <sub>2</sub> O] |
| <i>M<sub>r</sub></i>               | 1720.61                                                                                                                                                                  | 1721.41                                                                                                                                                    | 2915.07                                                                                                                                                   | 1760.85                                                                                                                                               |
| Crystal system, space group        | Tetragonal, <i>I</i> 4                                                                                                                                                   | Tetragonal, <i>I</i> 4                                                                                                                                     | Orthorhombic, <i>C</i> 222 <sub>1</sub>                                                                                                                   | Orthorhombic, <i>Pnn</i> 2                                                                                                                            |
| <i>a</i> , <i>b</i> , <i>c</i> (Å) | 28.306 (4), 28.306 (4), 18.617 (4)                                                                                                                                       | 28.6126 (1), 28.6126 (1), 18.3038 (2)                                                                                                                      | 32.4607 (6), 39.2830 (8), 20.2199 (3)                                                                                                                     | 28.9179 (5), 26.6083 (4), 10.6290 (1)                                                                                                                 |
| α, β, γ (°)                        | 90, 90, 90                                                                                                                                                               | 90, 90, 90                                                                                                                                                 | 90, 90, 90                                                                                                                                                | 90, 90, 90                                                                                                                                            |
| <i>V</i> (Å <sup>3</sup> )         | 14916 (5)                                                                                                                                                                | 14984.97 (19)                                                                                                                                              | 25783.5 (8)                                                                                                                                               | 8178.5 (2)                                                                                                                                            |
| <i>Z</i>                           | 8                                                                                                                                                                        | 8                                                                                                                                                          | 8                                                                                                                                                         | 4                                                                                                                                                     |
| Radiation type                     | Synchrotron, λ = 0.500 Å                                                                                                                                                 | Cu <i>K</i> α                                                                                                                                              | Cu <i>K</i> α                                                                                                                                             | Cu <i>K</i> α                                                                                                                                         |
| <i>m</i> (mm <sup>-1</sup> )       | 0.06                                                                                                                                                                     | 1.74                                                                                                                                                       | 1.35                                                                                                                                                      | 1.21                                                                                                                                                  |
| Crystal size (mm)                  | 0.05 × 0.02 × 0.02                                                                                                                                                       | 0.23 × 0.17 × 0.16                                                                                                                                         | 0.4 × 0.25 × 0.23                                                                                                                                         | 0.81 × 0.14 × 0.05                                                                                                                                    |
| Data collection                    |                                                                                                                                                                          |                                                                                                                                                            |                                                                                                                                                           |                                                                                                                                                       |
| Diffraction meter                  | Synchrotron                                                                                                                                                              | SuperNova, Dual, Cu at home/near, Atlas                                                                                                                    | SuperNova, Dual, Cu at home/near, Atlas                                                                                                                   | SuperNova, Dual, Cu at home/near, HyPix                                                                                                               |
| Absorption correction              | —                                                                                                                                                                        | Multi-scan <i>CrysAlis PRO</i> 1.171.40.84a (Rigaku Oxford Diffraction, 2020) Empirical absorption                                                         | Multi-scan <i>CrysAlis PRO</i> 1.171.39.46 (Rigaku Oxford Diffraction, 2018) Empirical absorption                                                         | Gaussian <i>CrysAlis PRO</i> 1.171.42.36a (Rigaku Oxford Diffraction, 2021) Numerical                                                                 |

|                                                                            |                                                                                    |                                                                                        |                                                                                        |                                                                                                                                                                                                   |
|----------------------------------------------------------------------------|------------------------------------------------------------------------------------|----------------------------------------------------------------------------------------|----------------------------------------------------------------------------------------|---------------------------------------------------------------------------------------------------------------------------------------------------------------------------------------------------|
|                                                                            |                                                                                    | correction using spherical harmonics, implemented in SCALE3 ABSPACK scaling algorithm. | correction using spherical harmonics, implemented in SCALE3 ABSPACK scaling algorithm. | absorption correction based on gaussian integration over a multifaceted crystal model Empirical absorption correction using spherical harmonics, implemented in SCALE3 ABSPACK scaling algorithm. |
| $T_{\min}$ ,<br>$T_{\max}$                                                 | —                                                                                  | 0.840, 1.000                                                                           | 0.802, 1.000                                                                           | 0.583, 1.000                                                                                                                                                                                      |
| No. of measured, independent and observed [ $I > 2\sigma(I)$ ] reflections | 262240, 17128, 13710                                                               | 142724, 14038, 13014                                                                   | 88456, 20353, 17074                                                                    | 40141, 12470, 7865                                                                                                                                                                                |
| $R_{\text{int}}$                                                           | 0.056                                                                              | 0.026                                                                                  | 0.075                                                                                  | 0.058                                                                                                                                                                                             |
| $(\sin \theta/\lambda)_{\max}$ ( $\text{\AA}^{-1}$ )                       | 0.649                                                                              | 0.619                                                                                  | 0.576                                                                                  | 0.602                                                                                                                                                                                             |
| Refinement                                                                 |                                                                                    |                                                                                        |                                                                                        |                                                                                                                                                                                                   |
| $R[F^2 > 2\sigma(F^2)]$ , $wR(F^2)$ , $S$                                  | 0.067, 0.223, 1.09                                                                 | 0.051, 0.152, 1.07                                                                     | 0.065, 0.199, 1.05                                                                     | 0.130, 0.385, 1.40                                                                                                                                                                                |
| No. of reflections                                                         | 17128                                                                              | 14038                                                                                  | 20353                                                                                  | 12470                                                                                                                                                                                             |
| No. of parameters                                                          | 938                                                                                | 916                                                                                    | 1283                                                                                   | 671                                                                                                                                                                                               |
| No. of restraints                                                          | 140                                                                                | 69                                                                                     | 173                                                                                    | 368                                                                                                                                                                                               |
|                                                                            | $w = 1/[\sigma^2(F_o^2) + (0.151P)^2 + 2.6259P]$<br>where $P = (F_o^2 + 2F_c^2)/3$ | $w = 1/[\sigma^2(F_o^2) + (0.0866P)^2 + 12.5155P]$<br>where $P = (F_o^2 + 2F_c^2)/3$   | $w = 1/[\sigma^2(F_o^2) + (0.1403P)^2]$<br>where $P = (F_o^2 + 2F_c^2)/3$              | $w = 1/[\sigma^2(F_o^2) + (0.2P)^2]$<br>where $P = (F_o^2 + 2F_c^2)/3$                                                                                                                            |
| $\Delta\rho_{\max}$ ,<br>$\Delta\rho_{\min}$ ( $\text{e \AA}^{-3}$ )       | 0.61, -0.77                                                                        | 0.66, -0.31                                                                            | 0.34, -0.23                                                                            | 1.96, -1.63                                                                                                                                                                                       |
| Absolute structure                                                         | Flack x determined using 5786 quotients [(I+)-(I-                                  | Flack x determined using 5536 quotients [(I+)-(I-                                      | Flack x determined using 6551 quotients [(I+)-(I-                                      | Flack x determined using 2096 quotients                                                                                                                                                           |

|                              |                                                                             |                                                                             |                                                                             |                                                                                      |
|------------------------------|-----------------------------------------------------------------------------|-----------------------------------------------------------------------------|-----------------------------------------------------------------------------|--------------------------------------------------------------------------------------|
|                              | )]/[(I+)+(I-)] (Parsons, Flack and Wagner, Acta Cryst. B69 (2013) 249-259). | )]/[(I+)+(I-)] (Parsons, Flack and Wagner, Acta Cryst. B69 (2013) 249-259). | )]/[(I+)+(I-)] (Parsons, Flack and Wagner, Acta Cryst. B69 (2013) 249-259). | [(I+)-(I-)]/[(I+)+(I-)] (Parsons, Flack and Wagner, Acta Cryst. B69 (2013) 249-259). |
| Absolute structure parameter | 0.5 (5)                                                                     | 0.502 (6)                                                                   | 0.12 (3)                                                                    | 0.49 (13)                                                                            |

Computer programs: *CrysAlis PRO* 1.171.40.84a (Rigaku OD, 2020), *CrysAlis PRO* 1.171.39.46 (Rigaku OD, 2018), *CrysAlis PRO* 1.171.42.36a (Rigaku OD, 2021), *SHELXT* 2014/5 (Sheldrick, 2014), *SHELXD* (Sheldrick, 2008), *SHELXT* 2018/2 (Sheldrick, 2018), *SHELXL* 2019/2 (Sheldrick, 2015), Olex2 1.5 (Dolomanov *et al.*, 2009).

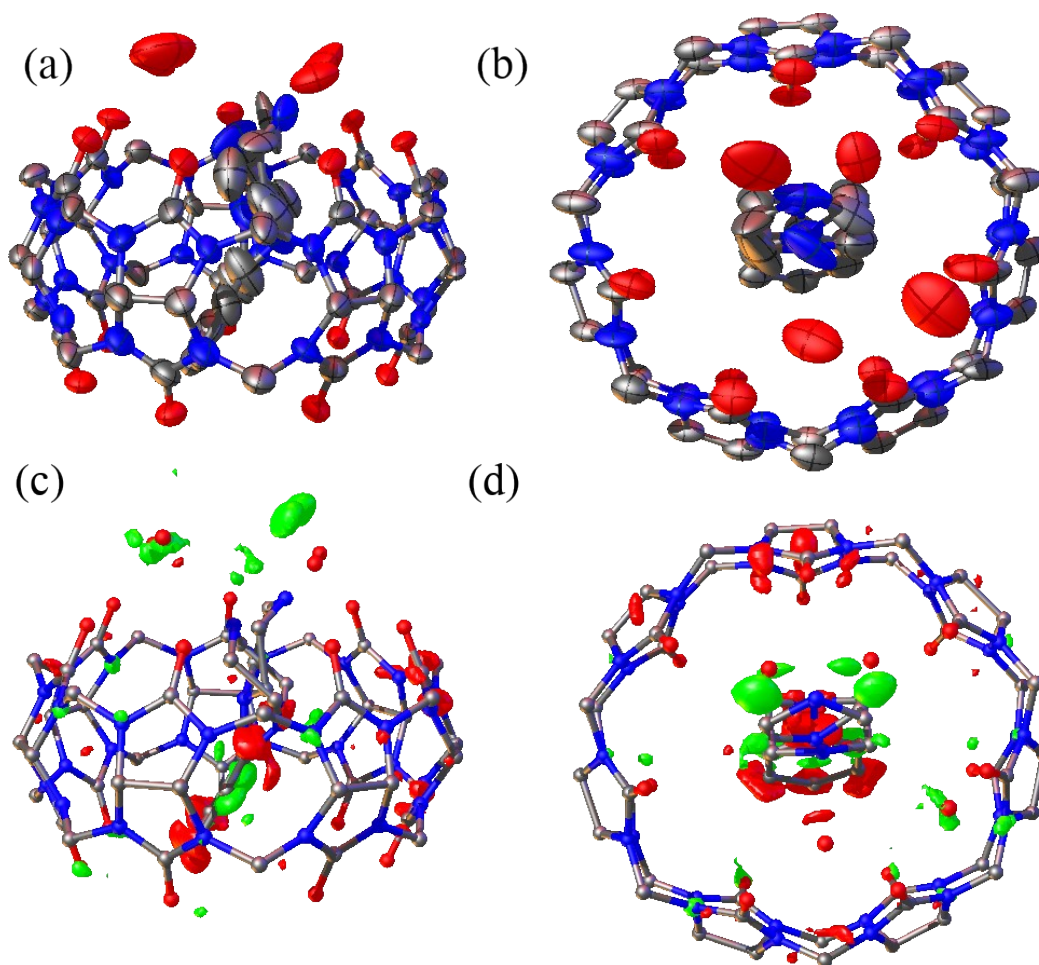

**Fig. S14** Asymmetric unit of **1** shown in two orientations. (a,c) side view; (b,d) top view. (a,b) Refined model with anisotropic displacement parameters (ADPs) for non-H atoms (H atoms omitted for clarity). (c,d) Residual electron-density (difference-Fourier) maps for the same orientations, contoured at  $\pm 0.25 \text{ e } \text{\AA}^{-3}$  (green,  $+0.25 \text{ e } \text{\AA}^{-3}$ ; red,  $-0.25 \text{ e } \text{\AA}^{-3}$ ).

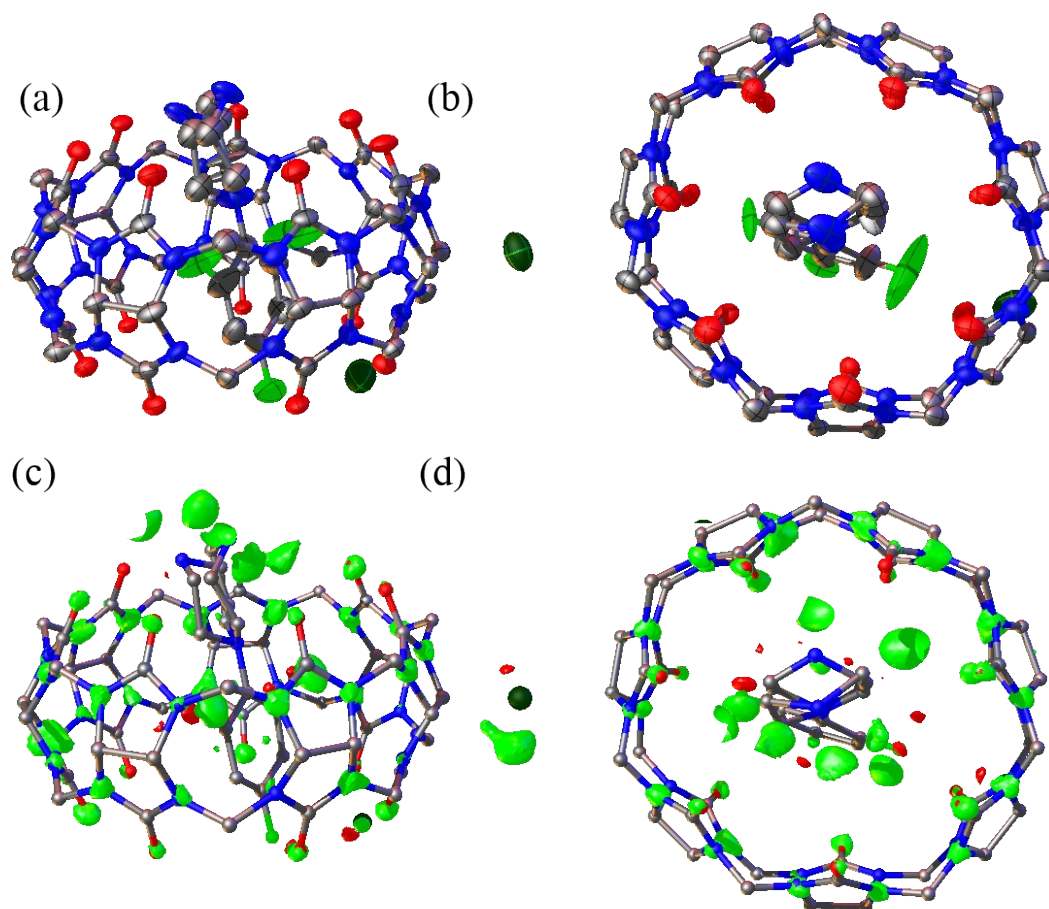

**Fig. S15** Asymmetric unit of **2** shown in two orientations. (a,c) side view; (b,d) top view. (a,b) Refined model with anisotropic displacement parameters (ADPs) for non-H atoms (H atoms omitted for clarity). (c,d) Residual electron-density (difference-Fourier) maps for the same orientations, contoured at  $\pm 0.20 \text{ e } \text{\AA}^{-3}$  (green,  $+0.20 \text{ e } \text{\AA}^{-3}$ ; red,  $-0.20 \text{ e } \text{\AA}^{-3}$ ).

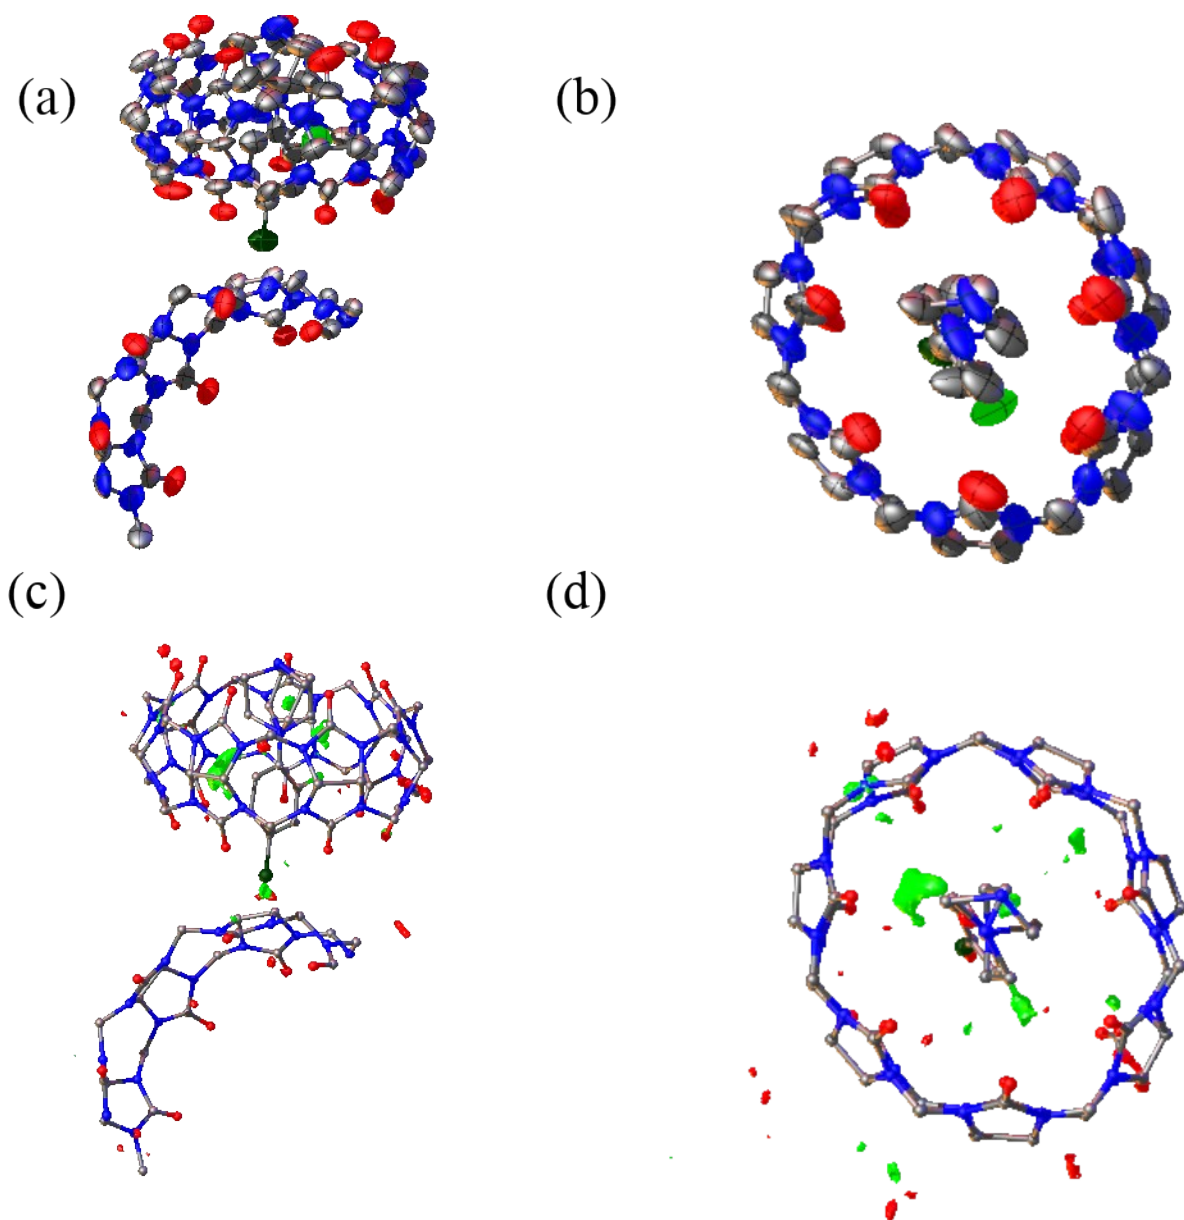

**Fig. S16** Asymmetric unit of **3** shown in two orientations. (a,c) side view; (b,d) top view. (a,b) Refined model with anisotropic displacement parameters (ADPs) for non-H atoms (H atoms omitted for clarity). (c,d) Residual electron-density (difference-Fourier) maps for the same orientations, contoured at  $\pm 0.20 \text{ e } \text{\AA}^{-3}$  (green,  $+0.20 \text{ e } \text{\AA}^{-3}$ ; red,  $-0.20 \text{ e } \text{\AA}^{-3}$ ).



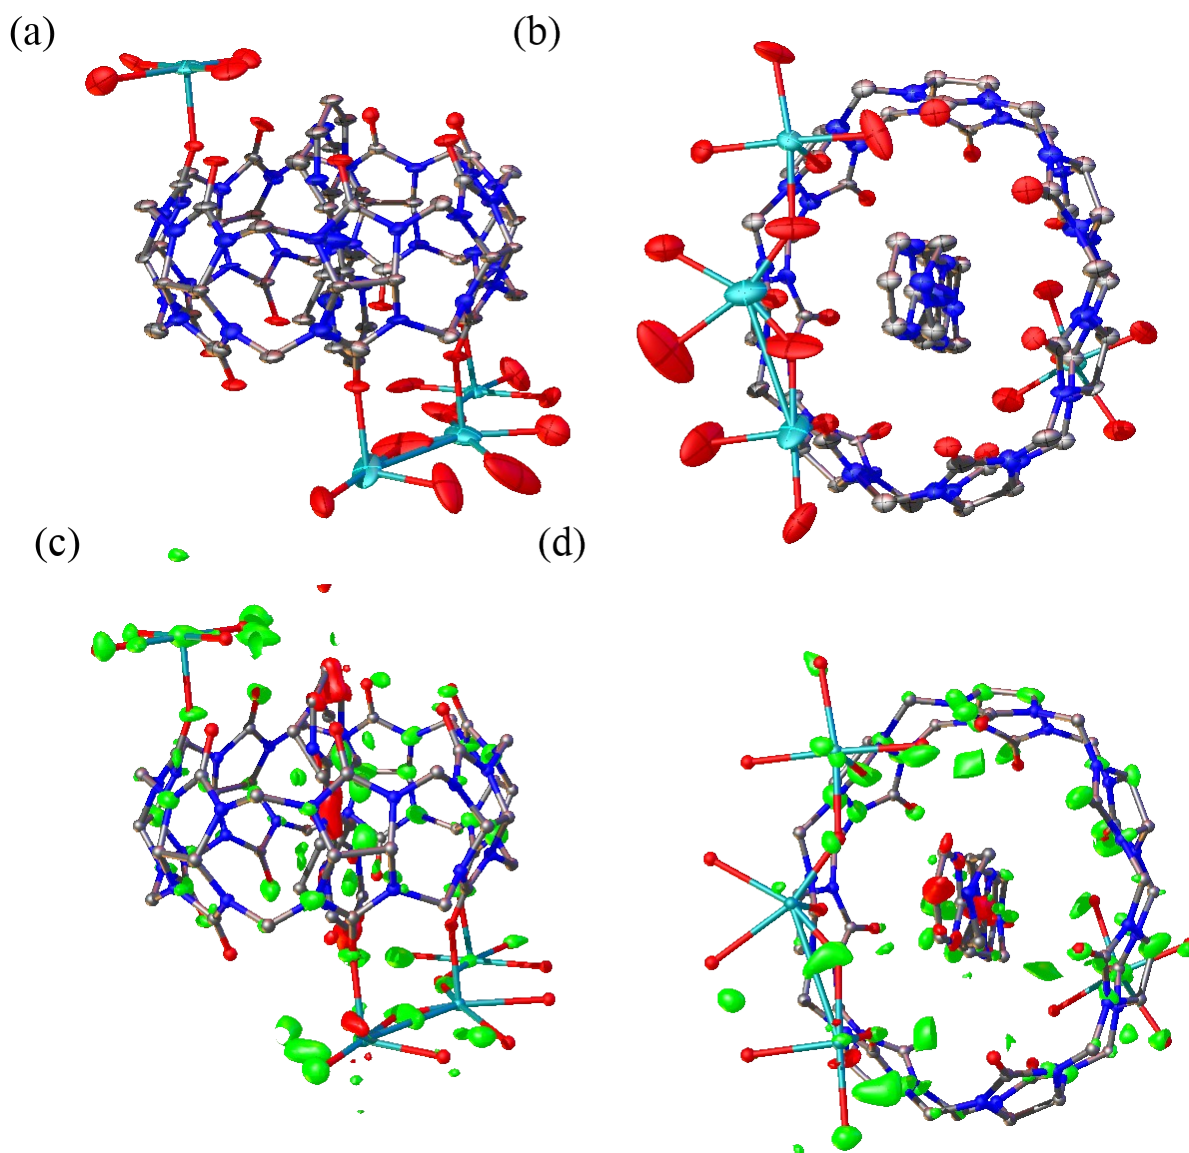

**Fig. S17** Asymmetric unit of **4** shown in two orientations. (a,c) side view; (b,d) top view. (a,b) Refined model with anisotropic displacement parameters (ADPs) for non-H atoms (H atoms omitted for clarity). (c,d) Residual electron-density (difference-Fourier) maps for the same orientations, contoured at  $\pm 0.80 \text{ e } \text{\AA}^{-3}$  (green,  $+0.80 \text{ e } \text{\AA}^{-3}$ ; red,  $-0.80 \text{ e } \text{\AA}^{-3}$ ).

**Table S4** Interaction energies calculated with different density functionals, basis sets and dielectric constants (DC)

|         | Functional      | M062X     | TPSS0   | TPSS0   | WB97M-V |
|---------|-----------------|-----------|---------|---------|---------|
|         |                 | Basis set | cc-pvDZ | cc-pvTZ | cc-pvTZ |
| Complex | DC<br>Conformer | Water     | Gas     | Water   | Water   |

|          | Functional      | M062X   | TPSS0   | TPSS0   | WB97M-V |
|----------|-----------------|---------|---------|---------|---------|
|          | Basis set       | cc-pvDZ | cc-pvTZ | cc-pvTZ | cc-pvTZ |
| Complex  | DC<br>Conformer | Water   | Gas     | Water   | Water   |
| CB[7]·1a | 1               | -169.0  | -228.3  | -24.0   | -195.8  |
| CB[7]·1a | 2               | -158.2  | -270.7  | -28.4   | -187.2  |
| CB[7]·1b | -               | -155.2  | -268.1  | -25.9   | -187.3  |
| CB[7]·1h | 1               | -176.5  | -274.2  | -34.2   | -205.2  |
| CB[7]·1h | 2               | -177.9  | -277.6  | -33.4   | -206.3  |
| CB[7]·1i | 1               | -178.8  | -278.2  | -34.2   | -209.3  |
| CB[7]·1i | 2               | -168.4  | -271.3  | -29.2   | -198.0  |
| CB[7]·2a | 1               | -153.1  | -283.2  | -30.7   | -181.0  |
| CB[7]·2a | 2               | -163.2  | -281.3  | -35.8   | -190.6  |

**Table S5** This table presents the various energy terms applicable to a given complex. The energy values for the observed disorder in the position of the ligand in the crystal structure are provided in Table 5.  $\Delta E_{\text{Int}}$  is the interaction energy,  $\Delta E_{\text{Disp}}$  is the SAPT dispersion energy, T is the temperature,  $\Delta S_{\text{APR}}$  is the entropy obtained from APR method,  $\Delta E_{\text{Def}}$  is the deformation energy for the host and guest,  $\Delta G_{\text{Exp}}$  is the experimental Gibbs free energy obtained from ITC studies,  $\Delta G_{\text{Calcd}}$  is the Hostaš's Gibbs free energy. All the energy values are in [kJ/mol] except T is in [K] and  $\Delta S$  in [kJ/mol·K].

| Complex  | $\Delta E_{\text{Int}}$ | $\Delta E_{\text{Disp}}$ | $\Delta G_{\text{Solv}}$ | $-T \cdot \Delta S_{\text{APR}}$ | $\Delta E_{\text{Def}}(\text{Host})$ | $\Delta E_{\text{Def}}(\text{Guest})$ | $\Delta G_{\text{Exp}}$ | $\Delta G_{\text{Calcd}}$ |
|----------|-------------------------|--------------------------|--------------------------|----------------------------------|--------------------------------------|---------------------------------------|-------------------------|---------------------------|
| CB[7]·1a | -169.0                  | -180.5                   | 268.6                    | -64.1                            | 130.1                                | 10.1                                  | -27.5                   | -65.7                     |
| CB[7]·1b | -155.2                  | -174.6                   | 281.3                    | -18.2                            | 137.0                                | 14.7                                  | -23.2                   | -27.9                     |
| CB[7]·1h | -179.0                  | -178.2                   | 262.5                    | -49.1                            | 144.0                                | 17.1                                  | -33.6                   | -73.7                     |
| CB[7]·1i | -178.8                  | -182.1                   | 265.4                    | -71.6                            | 136.7                                | 14.6                                  | -32.9                   | -104.3                    |
| CB[7]·2a | -163.2                  | -158.3                   | 267.7                    | -5.8                             | 145.5                                | 20.0                                  | -21.4                   | -21.9                     |

**Table S6** All SAPT energy components. All units are in [kJ/mol]

| Complex  | Conformer | $\Delta E_{\text{Electrostatics}}$ | $\Delta E_{\text{Exchange}}$ | $\Delta E_{\text{Induction}}$ | $\Delta E_{\text{Dispersion}}$ | $\Delta E_{\text{Total}}$ |
|----------|-----------|------------------------------------|------------------------------|-------------------------------|--------------------------------|---------------------------|
| CB[7]·1a | 1         | -256.10                            | 126.61                       | -70.05                        | -180.43                        | -379.97                   |
| CB[7]·1a | 2         | -304.30                            | 124.91                       | -72.56                        | -169.57                        | -421.51                   |
| CB[7]·1b | -         | -298.23                            | 133.77                       | -80.82                        | -174.59                        | -419.87                   |
| CB[7]·1h | 1         | -304.26                            | 118.87                       | -69.20                        | -173.89                        | -428.49                   |
| CB[7]·1h | 2         | -310.72                            | 126.53                       | -72.46                        | -177.76                        | -434.41                   |
| CB[7]·1i | 1         | -310.05                            | 127.49                       | -74.64                        | -181.31                        | -438.52                   |
| CB[7]·1i | 2         | -306.79                            | 135.05                       | -76.92                        | -178.68                        | -427.35                   |
| CB[7]·1j | -         | -300.89                            | 122.84                       | -64.96                        | -201.59                        | -444.60                   |
| CB[7]·2a | 1         | -314.10                            | 104.87                       | -62.38                        | -154.42                        | -426.03                   |
| CB[7]·2a | 2         | -307.64                            | 102.91                       | -63.18                        | -157.67                        | -425.58                   |

**Table S7** Thermodynamic parameters for bonding reaction:  $\Delta G$  is the Gibbs free energy [kJ / mol],  $\Delta H$  is the enthalpy [kJ / mol], T is temperature of 298K, and  $\Delta S$  is the entropy [kJ / mol·K] obtained using APR approach.

| Complex  | Conformer | $\Delta G$ | $\Delta H$ | $-T \cdot \Delta S$ |
|----------|-----------|------------|------------|---------------------|
| CB[7]·1a | 1         | -180.2     | -220.8     | 40.6                |
| CB[7]·1a | 2         | -290.2     | -225.8     | -64.4               |
| CB[7]·1b | -         | -240.0     | -221.8     | -18.2               |
| CB[7]·1h | 1         | -323.7     | -271.3     | -52.4               |
| CB[7]·1h | 2         | -313.8     | -273.9     | -39.9               |
| CB[7]·1i | 1         | -347.0     | -272.6     | -74.4               |
| CB[7]·1i | 2         | -328.1     | -274.4     | -53.7               |
| CB[7]·2a | 1         | -220.4     | -201.5     | -18.9               |
| CB[7]·2a | 2         | -215.5     | -214.9     | -0.6                |

**Table S8** All these parameters were obtained with molecular dynamics simulations by using APR method.  $\Delta G$  is the Gibbs free energy [kJ / mol],  $\Delta H$  is the enthalpy [kJ / mol], T is temperature [K] and  $\Delta S$  is the entropy [kJ / mol·K].

| Complex  | $\Delta G_{\text{APR}}$ | $\Delta H_{\text{APR}}$ | $-T \cdot \Delta S_{\text{APR}}$ |
|----------|-------------------------|-------------------------|----------------------------------|
| CB[7]·1a | -288.9                  | -224.7                  | -64.2                            |
| CB[7]·1b | -240.0                  | -221.8                  | -18.2                            |
| CB[7]·1h | -322.5                  | -272.7                  | -49.8                            |
| CB[7]·1i | -345.7                  | -273.5                  | -72.3                            |
| CB[7]·2a | -219.9                  | -211.0                  | -9.0                             |

**Table S9** Geometrical parameters, QTAIM properties at the bond critical points (in a.u.  $\times 10^3$ ),  $E(r_c)$  is in kJ/mol, and classification of all inter- and intramolecular hydrogen bonds. GC is geometric classification, EC corresponds to energy classification and HC stands for Hayashi classification. The number in square brackets corresponds to the glycoluril unit in CB7.

| Complex | Conformer | Bond                | $\angle(X-H \cdots X)$ | $d(\text{\AA})$ | $\rho(r_c)$ | $\nabla^2 \rho(r_c)$ | $V(r_c)$ | $H(r_c)$ | $E(r_c)$ | GC   | EC   | HC  |
|---------|-----------|---------------------|------------------------|-----------------|-------------|----------------------|----------|----------|----------|------|------|-----|
| CB7·1a  | 1         | [O1]3 $\cdots$ HC3' | 144.9                  | 2.434           | 9.3         | 35.1                 | -5.4     | 1.7      | 5.2      | Weak | Weak | pCS |

| Complex | Conformer | Bond         | $\angle(\text{X-H}\cdots\text{X})$ | $d(\text{\AA})$ | $\rho(r_c)$ | $\nabla^2\rho(r_c)$ | $V(r_c)$ | $H(r_c)$ | $E(r_c)$ | GC   | EC   | HC  |
|---------|-----------|--------------|------------------------------------|-----------------|-------------|---------------------|----------|----------|----------|------|------|-----|
| CB7·1a  | 1         | [O1]7···HC5' | 144.9                              | 2.434           | 9.3         | 35.0                | -5.3     | 1.7      | 5.2      | Weak | Weak | pCS |
| CB7·1a  | 1         | [O2]1···HeC5 | 104.6                              | 2.664           | 7.9         | 31.3                | -4.7     | 1.6      | 4.8      | Weak | Weak | pCS |
| CB7·1a  | 1         | [O2]2···HeC3 | 104.4                              | 2.665           | 7.9         | 31.4                | -4.7     | 1.6      | 4.8      | Weak | Weak | pCS |
| CB7·1a  | 1         | [O2]3···HeC3 | 154.7                              | 2.344           | 11.3        | 42.9                | -6.6     | 2.0      | 6.2      | Weak | Weak | pCS |
| CB7·1a  | 1         | [O2]4···HaC2 | 115.8                              | 2.768           | 5.8         | 21.1                | -3.2     | 1.1      | 3.7      | Weak | Weak | pCS |
| CB7·1a  | 1         | [O2]5···HaC2 | 144.5                              | 2.871           | 4.2         | 14.1                | -2.2     | 0.7      | 2.9      | Weak | Weak | pCS |
| CB7·1a  | 1         | [O2]5···HaC6 | 144.4                              | 2.873           | 4.1         | 14.1                | -2.1     | 0.7      | 2.9      | Weak | Weak | pCS |
| CB7·1a  | 1         | [O2]6···HeC6 | 115.8                              | 2.768           | 5.8         | 21.1                | -3.2     | 1.1      | 3.7      | Weak | Weak | pCS |
| CB7·1a  | 1         | [O2]7···HeC5 | 154.6                              | 2.344           | 11.3        | 42.8                | -6.6     | 2.0      | 6.2      | Weak | Weak | pCS |
| CB7·1a  | 1         | C2'H···HC2   | -                                  | 1.913           | 16.3        | 58.9                | -10.4    | 2.2      | 8.9      | -    | Weak | pCS |
| CB7·1a  | 1         | C6'H···HeC6  | -                                  | 1.913           | 16.2        | 58.9                | -10.4    | 2.2      | 8.9      | -    | Weak | pCS |
| CB7·1a  | 2         | [N4]5···HC6' | 114.7                              | 3.885           | 0.9         | 3.1                 | -0.3     | 0.2      | 1.6      | Weak | Weak | pCS |
| CB7·1a  | 2         | [N6]2···HC2' | 124.5                              | 3.627           | 1.2         | 4.5                 | -0.5     | 0.3      | 1.7      | Weak | Weak | pCS |
| CB7·1a  | 2         | [N6]3···HC2' | 126.5                              | 3.544           | 1.4         | 5.4                 | -0.6     | 0.4      | 1.8      | Weak | Weak | pCS |
| CB7·1a  | 2         | [N8]1···HaC2 | 161.6                              | 3.168           | 2.6         | 8.9                 | -1.2     | 0.5      | 2.2      | Weak | Weak | pCS |
| CB7·1a  | 2         | [N8]6···HC6' | 127.8                              | 3.538           | 1.4         | 5.5                 | -0.6     | 0.4      | 1.8      | Weak | Weak | pCS |
| CB7·1a  | 2         | [O1]2···HC3' | 118.0                              | 2.790           | 5.4         | 18.9                | -2.9     | 0.9      | 3.4      | Weak | Weak | pCS |
| CB7·1a  | 2         | [O1]3···HC3' | 152.3                              | 2.464           | 8.7         | 31.9                | -4.9     | 1.5      | 4.9      | Weak | Weak | pCS |
| CB7·1a  | 2         | [O1]5···HC5' | 150.4                              | 2.537           | 7.5         | 27.0                | -4.2     | 1.3      | 4.4      | Weak | Weak | pCS |
| CB7·1a  | 2         | [O1]6···HC5' | 118.4                              | 2.739           | 5.9         | 21.0                | -3.2     | 1.0      | 3.7      | Weak | Weak | pCS |
| CB7·1a  | 2         | [O2]1···HaC6 | 123.4                              | 2.929           | 4.2         | 15.2                | -2.2     | 0.8      | 2.9      | Weak | Weak | pCS |
| CB7·1a  | 2         | [O2]2···HaC2 | 109.2                              | 2.892           | 4.9         | 18.8                | -2.7     | 1.0      | 3.3      | Weak | Weak | pCS |
| CB7·1a  | 2         | [O2]2···HeC3 | 135.5                              | 2.446           | 9.0         | 35.3                | -5.2     | 1.8      | 5.1      | Weak | Weak | pCS |
| CB7·1a  | 2         | [O2]3···HeC2 | 127.7                              | 2.787           | 5.0         | 17.9                | -2.6     | 0.9      | 3.3      | Weak | Weak | pCS |
| CB7·1a  | 2         | [O2]3···HeC3 | 110.5                              | 2.899           | 4.0         | 15.9                | -2.2     | 0.9      | 3.0      | Weak | Weak | pCS |
| CB7·1a  | 2         | [O2]4···HaC3 | 136.2                              | 2.598           | 6.5         | 24.1                | -3.6     | 1.2      | 4.0      | Weak | Weak | pCS |
| CB7·1a  | 2         | [O2]5···HaC5 | 141.6                              | 2.542           | 7.1         | 26.9                | -4.0     | 1.4      | 4.3      | Weak | Weak | pCS |
| CB7·1a  | 2         | [O2]6···HeC5 | 106.3                              | 2.818           | 5.0         | 20.2                | -2.9     | 1.1      | 3.4      | Weak | Weak | pCS |
| CB7·1a  | 2         | [O2]6···HeC6 | 126.8                              | 2.707           | 6.0         | 21.6                | -3.2     | 1.1      | 3.7      | Weak | Weak | pCS |
| CB7·1a  | 2         | [O2]7···HaC6 | 108.4                              | 2.958           | 4.3         | 16.8                | -2.3     | 0.9      | 3.1      | Weak | Weak | pCS |
| CB7·1a  | 2         | [O2]7···HeC5 | 137.8                              | 2.455           | 8.7         | 34.0                | -5.0     | 1.7      | 5.0      | Weak | Weak | pCS |
| CB7·1a  | 2         | C2'H···HC2   | -                                  | 1.946           | 16.5        | 62.5                | -11.2    | 2.2      | 9.5      | -    | Weak | pCS |
| CB7·1a  | 2         | C6'H···HeC6  | -                                  | 1.933           | 16.6        | 62.3                | -11.2    | 2.2      | 9.4      | -    | Weak | pCS |
| CB7·1b  | -         | [C7]6···HeC6 | 138.2                              | 3.114           | 2.3         | 9.9                 | -1.1     | 0.7      | 2.2      | Weak | Weak | pCS |

| Complex | Conformer | Bond         | $\angle(\text{X-H}\cdots\text{X})$ | $d(\text{\AA})$ | $\rho(r_c)$ | $\nabla^2\rho(r_c)$ | $V(r_c)$ | $H(r_c)$ | $E(r_c)$ | GC   | EC   | HC  |
|---------|-----------|--------------|------------------------------------|-----------------|-------------|---------------------|----------|----------|----------|------|------|-----|
| CB7·1b  | -         | [N2]2···HaC2 | 118.2                              | 3.591           | 1.4         | 4.8                 | -0.5     | 0.3      | 1.8      | Weak | Weak | pCS |
| CB7·1b  | -         | [N4]2···HaC2 | 157.7                              | 3.550           | 1.3         | 4.4                 | -0.5     | 0.3      | 1.8      | Weak | Weak | pCS |
| CB7·1b  | -         | [N4]6···HeC6 | 162.9                              | 3.622           | 1.1         | 3.8                 | -0.4     | 0.3      | 1.7      | Weak | Weak | pCS |
| CB7·1b  | -         | [N6]2···HeC2 | 142.7                              | 2.950           | 4.5         | 14.8                | -2.1     | 0.8      | 2.9      | Weak | Weak | pCS |
| CB7·1b  | -         | [N6]7···HaC6 | 169.8                              | 3.086           | 3.1         | 10.7                | -1.4     | 0.6      | 2.4      | Weak | Weak | pCS |
| CB7·1b  | -         | [N8]7···HaC6 | 136.0                              | 3.144           | 2.9         | 10.2                | -1.3     | 0.6      | 2.4      | Weak | Weak | pCS |
| CB7·1b  | -         | [O1]3···HC3' | 124.2                              | 2.552           | 7.7         | 29.5                | -4.4     | 1.5      | 4.5      | Weak | Weak | pCS |
| CB7·1b  | -         | [O1]4···HC3' | 126.5                              | 2.766           | 5.0         | 17.8                | -2.7     | 0.9      | 3.3      | Weak | Weak | pCS |
| CB7·1b  | -         | [O1]7···HC5' | 138.9                              | 2.501           | 7.9         | 30.0                | -4.4     | 1.5      | 4.6      | Weak | Weak | pCS |
| CB7·1b  | -         | [O1]7···HC6' | 113.0                              | 3.125           | 2.9         | 12.2                | -1.5     | 0.8      | 2.5      | Weak | Weak | pCS |
| CB7·1b  | -         | [O2]2···HeC3 | 143.7                              | 2.390           | 10.3        | 39.2                | -6.0     | 1.9      | 5.7      | Weak | Weak | pCS |
| CB7·1b  | -         | [O2]3···HeC3 | 115.1                              | 2.611           | 7.3         | 27.9                | -4.2     | 1.4      | 4.4      | Weak | Weak | pCS |
| CB7·1b  | -         | [O2]4···HaC3 | 160.2                              | 2.434           | 8.9         | 33.4                | -5.1     | 1.6      | 5.0      | Weak | Weak | pCS |
| CB7·1b  | -         | [O2]5···HaC5 | 157.7                              | 2.545           | 7.2         | 25.8                | -3.9     | 1.3      | 4.2      | Weak | Weak | pCS |
| CB7·1b  | -         | [O2]6···HeC5 | 114.0                              | 2.859           | 4.5         | 16.5                | -2.4     | 0.9      | 3.1      | Weak | Weak | pCS |
| CB7·1b  | -         | [O2]7···HeC5 | 144.9                              | 2.316           | 11.7        | 46.5                | -7.0     | 2.3      | 6.5      | Weak | Weak | pCS |
| CB7·1h  | 1         | [N6]7···HaC6 | 148.1                              | 3.551           | 1.4         | 4.5                 | -0.5     | 0.3      | 1.8      | Weak | Weak | pCS |
| CB7·1h  | 1         | [N8]2···HeC2 | 127.9                              | 3.523           | 1.5         | 6.0                 | -0.6     | 0.4      | 1.8      | Weak | Weak | pCS |
| CB7·1h  | 1         | [N8]6···HeC6 | 154.8                              | 3.605           | 1.1         | 3.9                 | -0.4     | 0.3      | 1.7      | Weak | Weak | pCS |
| CB7·1h  | 1         | [O1]3···HC3' | 133.6                              | 2.852           | 3.8         | 13.8                | -2.0     | 0.7      | 2.8      | Weak | Weak | pCS |
| CB7·1h  | 1         | [O1]6···HC5' | 119.1                              | 2.565           | 7.8         | 30.1                | -4.5     | 1.5      | 4.6      | Weak | Weak | pCS |
| CB7·1h  | 1         | [O1]7···HC5' | 134.4                              | 2.544           | 7.5         | 27.8                | -4.2     | 1.4      | 4.4      | Weak | Weak | pCS |
| CB7·1h  | 1         | [O2]1···HaC2 | 126.8                              | 2.800           | 5.8         | 21.0                | -3.1     | 1.1      | 3.6      | Weak | Weak | pCS |
| CB7·1h  | 1         | [O2]2···HeC3 | 156.6                              | 2.405           | 9.6         | 36.2                | -5.5     | 1.8      | 5.4      | Weak | Weak | pCS |
| CB7·1h  | 1         | [O2]3···HaC3 | 104.1                              | 2.861           | 5.1         | 20.6                | -2.9     | 1.1      | 3.5      | Weak | Weak | pCS |
| CB7·1h  | 1         | [O2]4···HaC3 | 163.8                              | 2.561           | 7.1         | 24.9                | -3.8     | 1.2      | 4.2      | Weak | Weak | pCS |
| CB7·1h  | 1         | [O2]4···HaC5 | 145.3                              | 3.043           | 2.8         | 9.6                 | -1.4     | 0.5      | 2.4      | Weak | Weak | pCS |
| CB7·1h  | 1         | [O2]5···HaC5 | 126.8                              | 2.700           | 5.8         | 20.5                | -3.1     | 1.0      | 3.6      | Weak | Weak | pCS |
| CB7·1h  | 1         | [O2]6···HeC5 | 133.0                              | 2.509           | 8.0         | 30.3                | -4.5     | 1.5      | 4.6      | Weak | Weak | pCS |
| CB7·1h  | 1         | [O2]7···HaC6 | 120.2                              | 2.741           | 6.3         | 22.9                | -3.4     | 1.2      | 3.8      | Weak | Weak | pCS |
| CB7·1h  | 1         | [O2]7···HeC5 | 119.6                              | 2.566           | 7.8         | 30.1                | -4.5     | 1.5      | 4.6      | Weak | Weak | pCS |
| CB7·1h  | 2         | [N2]5···HeC6 | 146.4                              | 3.551           | 1.3         | 4.5                 | -0.5     | 0.3      | 1.8      | Weak | Weak | pCS |
| CB7·1h  | 2         | [N4]2···HaC2 | 120.6                              | 3.633           | 1.3         | 4.4                 | -0.5     | 0.3      | 1.7      | Weak | Weak | pCS |
| CB7·1h  | 2         | [N4]6···HeC6 | 155.2                              | 3.551           | 1.3         | 4.6                 | -0.5     | 0.3      | 1.8      | Weak | Weak | pCS |

| Complex | Conformer | Bond         | $\angle(\text{X-H}\cdots\text{X})$ | $d(\text{\AA})$ | $\rho(r_c)$ | $\nabla^2\rho(r_c)$ | $V(r_c)$ | $H(r_c)$ | $E(r_c)$ | GC   | EC   | HC  |
|---------|-----------|--------------|------------------------------------|-----------------|-------------|---------------------|----------|----------|----------|------|------|-----|
| CB7·1h  | 2         | [N6]2···HaC2 | 118.5                              | 3.550           | 1.4         | 5.3                 | -0.6     | 0.4      | 1.8      | Weak | Weak | pCS |
| CB7·1h  | 2         | [N8]2···HeC2 | 122.3                              | 3.539           | 1.4         | 5.3                 | -0.6     | 0.4      | 1.8      | Weak | Weak | pCS |
| CB7·1h  | 2         | [O1]3···HC3' | 134.1                              | 2.680           | 5.4         | 20.0                | -3.0     | 1.0      | 3.5      | Weak | Weak | pCS |
| CB7·1h  | 2         | [O1]4···HC3' | 113.3                              | 2.797           | 5.3         | 19.4                | -2.8     | 1.0      | 3.4      | Weak | Weak | pCS |
| CB7·1h  | 2         | [O1]6···HC5' | 115.3                              | 2.603           | 7.5         | 28.9                | -4.3     | 1.5      | 4.5      | Weak | Weak | pCS |
| CB7·1h  | 2         | [O1]7···HC5' | 134.8                              | 2.696           | 5.4         | 19.4                | -2.9     | 1.0      | 3.5      | Weak | Weak | pCS |
| CB7·1h  | 2         | [O2]1···HaC2 | 122.2                              | 2.954           | 4.3         | 15.8                | -2.2     | 0.9      | 3.0      | Weak | Weak | pCS |
| CB7·1h  | 2         | [O2]2···HeC3 | 159.7                              | 2.393           | 9.9         | 37.1                | -5.7     | 1.8      | 5.5      | Weak | Weak | pCS |
| CB7·1h  | 2         | [O2]3···HaC3 | 104.4                              | 2.939           | 4.3         | 17.2                | -2.3     | 1.0      | 3.1      | Weak | Weak | pCS |
| CB7·1h  | 2         | [O2]4···HaC3 | 166.6                              | 2.370           | 10.1        | 38.5                | -5.9     | 1.9      | 5.6      | Weak | Weak | pCS |
| CB7·1h  | 2         | [O2]5···HaC5 | 127.9                              | 2.517           | 8.4         | 31.2                | -4.7     | 1.5      | 4.8      | Weak | Weak | pCS |
| CB7·1h  | 2         | [O2]6···HeC5 | 128.9                              | 2.585           | 7.0         | 26.0                | -3.9     | 1.3      | 4.2      | Weak | Weak | pCS |
| CB7·1h  | 2         | [O2]6···HeC6 | 112.3                              | 3.129           | 3.1         | 12.9                | -1.6     | 0.8      | 2.5      | Weak | Weak | pCS |
| CB7·1h  | 2         | [O2]7···HaC6 | 115.5                              | 2.876           | 4.8         | 17.9                | -2.6     | 0.9      | 3.2      | Weak | Weak | pCS |
| CB7·1h  | 2         | [O2]7···HeC5 | 126.4                              | 2.495           | 8.5         | 33.2                | -4.9     | 1.7      | 4.9      | Weak | Weak | pCS |
| CB7·1i  | 1         | [N4]2···HaC2 | 122.8                              | 3.592           | 1.4         | 4.6                 | -0.5     | 0.3      | 1.8      | Weak | Weak | pCS |
| CB7·1i  | 1         | [N4]6···HeC6 | 155.6                              | 3.550           | 1.3         | 4.6                 | -0.5     | 0.3      | 1.8      | Weak | Weak | pCS |
| CB7·1i  | 1         | [N6]2···HaC2 | 120.6                              | 3.552           | 1.4         | 5.3                 | -0.6     | 0.4      | 1.8      | Weak | Weak | pCS |
| CB7·1i  | 1         | [N8]2···HeC2 | 120.4                              | 3.549           | 1.4         | 5.2                 | -0.6     | 0.4      | 1.8      | Weak | Weak | pCS |
| CB7·1i  | 1         | [O1]3···HC3' | 135.5                              | 2.667           | 5.5         | 20.4                | -3.0     | 1.0      | 3.6      | Weak | Weak | pCS |
| CB7·1i  | 1         | [O1]4···HC3' | 113.7                              | 2.776           | 5.5         | 20.1                | -2.9     | 1.0      | 3.5      | Weak | Weak | pCS |
| CB7·1i  | 1         | [O1]6···HC5' | 115.8                              | 2.587           | 7.7         | 29.8                | -4.4     | 1.5      | 4.6      | Weak | Weak | pCS |
| CB7·1i  | 1         | [O1]7···HC5' | 135.5                              | 2.720           | 5.1         | 18.4                | -2.8     | 0.9      | 3.4      | Weak | Weak | pCS |
| CB7·1i  | 1         | [O2]1···HaC2 | 122.0                              | 3.012           | 3.8         | 14.2                | -1.9     | 0.8      | 2.8      | Weak | Weak | pCS |
| CB7·1i  | 1         | [O2]2···HeC3 | 160.4                              | 2.405           | 9.7         | 36.0                | -5.5     | 1.8      | 5.4      | Weak | Weak | pCS |
| CB7·1i  | 1         | [O2]4···HaC3 | 166.9                              | 2.378           | 10.0        | 37.8                | -5.8     | 1.8      | 5.6      | Weak | Weak | pCS |
| CB7·1i  | 1         | [O2]5···HaC5 | 130.9                              | 2.513           | 8.3         | 30.8                | -4.7     | 1.5      | 4.7      | Weak | Weak | pCS |
| CB7·1i  | 1         | [O2]6···HeC5 | 127.5                              | 2.579           | 7.2         | 26.7                | -4.0     | 1.3      | 4.3      | Weak | Weak | pCS |
| CB7·1i  | 1         | [O2]6···HeC6 | 112.7                              | 3.117           | 3.2         | 13.1                | -1.6     | 0.8      | 2.6      | Weak | Weak | pCS |
| CB7·1i  | 1         | [O2]7···HaC6 | 113.9                              | 2.927           | 4.4         | 16.8                | -2.4     | 0.9      | 3.1      | Weak | Weak | pCS |
| CB7·1i  | 1         | [O2]7···HeC5 | 128.9                              | 2.459           | 9.1         | 35.6                | -5.3     | 1.8      | 5.2      | Weak | Weak | pCS |
| CB7·1i  | 2         | [C7]3···HeC2 | 130.5                              | 3.136           | 2.2         | 9.5                 | -1.1     | 0.7      | 2.1      | Weak | Weak | pCS |
| CB7·1i  | 2         | [N2]6···HeC6 | 150.9                              | 3.548           | 1.3         | 4.6                 | -0.5     | 0.3      | 1.8      | Weak | Weak | pCS |
| CB7·1i  | 2         | [N4]3···HeC2 | 163.3                              | 3.548           | 1.2         | 4.5                 | -0.5     | 0.3      | 1.7      | Weak | Weak | pCS |

| Complex | Conformer | Bond         | $\angle(\text{X-H}\cdots\text{X})$ | $d(\text{\AA})$ | $\rho(r_c)$ | $\nabla^2\rho(r_c)$ | $V(r_c)$ | $H(r_c)$ | $E(r_c)$ | GC   | EC   | HC  |
|---------|-----------|--------------|------------------------------------|-----------------|-------------|---------------------|----------|----------|----------|------|------|-----|
| CB7·1i  | 2         | [N8]7···HaC6 | 152.3                              | 2.750           | 6.7         | 22.3                | -3.3     | 1.2      | 3.7      | Weak | Weak | pCS |
| CB7·1i  | 2         | [O1]1···HC5' | 108.1                              | 2.898           | 4.7         | 17.3                | -2.4     | 0.9      | 3.1      | Weak | Weak | pCS |
| CB7·1i  | 2         | [O1]2···HC5' | 132.6                              | 2.647           | 5.9         | 21.9                | -3.3     | 1.1      | 3.7      | Weak | Weak | pCS |
| CB7·1i  | 2         | [O1]2···HC6' | 116.7                              | 3.053           | 3.1         | 12.2                | -1.6     | 0.7      | 2.5      | Weak | Weak | pCS |
| CB7·1i  | 2         | [O1]5···HC3' | 130.5                              | 2.733           | 5.0         | 18.3                | -2.7     | 0.9      | 3.3      | Weak | Weak | pCS |
| CB7·1i  | 2         | [O1]6···HC3' | 122.6                              | 2.579           | 7.3         | 27.8                | -4.1     | 1.4      | 4.3      | Weak | Weak | pCS |
| CB7·1i  | 2         | [O2]1···HaC2 | 127.3                              | 2.855           | 5.0         | 17.9                | -2.6     | 0.9      | 3.2      | Weak | Weak | pCS |
| CB7·1i  | 2         | [O2]2···HeC3 | 152.5                              | 2.259           | 13.1        | 51.8                | -8.1     | 2.4      | 7.2      | Weak | Weak | pCS |
| CB7·1i  | 2         | [O2]3···HeC3 | 106.9                              | 2.783           | 5.7         | 22.7                | -3.2     | 1.2      | 3.7      | Weak | Weak | pCS |
| CB7·1i  | 2         | [O2]4···HaC3 | 174.1                              | 2.884           | 3.6         | 12.1                | -1.8     | 0.6      | 2.7      | Weak | Weak | pCS |
| CB7·1i  | 2         | [O2]5···HaC5 | 155.6                              | 2.764           | 4.6         | 15.6                | -2.4     | 0.8      | 3.1      | Weak | Weak | pCS |
| CB7·1i  | 2         | [O2]6···HeC5 | 123.6                              | 2.470           | 9.2         | 35.7                | -5.3     | 1.8      | 5.2      | Weak | Weak | pCS |
| CB7·1i  | 2         | [O2]7···HeC5 | 135.9                              | 2.423           | 9.9         | 37.6                | -5.7     | 1.8      | 5.5      | Weak | Weak | pCS |
| CB7·2a  | 1         | [N4]4···HeC2 | 149.6                              | 3.500           | 1.4         | 5.2                 | -0.6     | 0.4      | 1.8      | Weak | Weak | pCS |
| CB7·2a  | 1         | [N6]7···HeC6 | 120.9                              | 3.551           | 1.4         | 5.6                 | -0.6     | 0.4      | 1.8      | Weak | Weak | pCS |
| CB7·2a  | 1         | [O1]2···HC3' | 110.3                              | 3.004           | 3.6         | 13.2                | -1.8     | 0.7      | 2.7      | Weak | Weak | pCS |
| CB7·2a  | 1         | [O1]3···HC3' | 146.3                              | 2.402           | 9.6         | 37.0                | -5.6     | 1.8      | 5.4      | Weak | Weak | pCS |
| CB7·2a  | 1         | [O1]6···HC5' | 142.4                              | 2.483           | 8.3         | 30.9                | -4.7     | 1.5      | 4.7      | Weak | Weak | pCS |
| CB7·2a  | 1         | [O1]7···HC5' | 116.2                              | 2.675           | 6.4         | 24.1                | -3.6     | 1.2      | 4.0      | Weak | Weak | pCS |
| CB7·2a  | 1         | [O2]1···HaC6 | 124.1                              | 2.906           | 4.6         | 16.9                | -2.4     | 0.9      | 3.1      | Weak | Weak | pCS |
| CB7·2a  | 1         | [O2]2···HaC2 | 115.6                              | 2.897           | 4.9         | 18.7                | -2.7     | 1.0      | 3.3      | Weak | Weak | pCS |
| CB7·2a  | 1         | [O2]2···HeC3 | 125.8                              | 2.471           | 9.1         | 35.5                | -5.3     | 1.8      | 5.2      | Weak | Weak | pCS |
| CB7·2a  | 1         | [O2]3···HeC3 | 130.2                              | 2.538           | 7.7         | 28.9                | -4.3     | 1.4      | 4.5      | Weak | Weak | pCS |
| CB7·2a  | 1         | [O2]4···HaC3 | 130.0                              | 2.694           | 5.6         | 20.1                | -3.1     | 1.0      | 3.6      | Weak | Weak | pCS |
| CB7·2a  | 1         | [O2]5···HaC3 | 145.7                              | 3.106           | 2.5         | 8.6                 | -1.2     | 0.5      | 2.2      | Weak | Weak | pCS |
| CB7·2a  | 1         | [O2]5···HaC5 | 161.6                              | 2.630           | 6.2         | 21.3                | -3.3     | 1.0      | 3.8      | Weak | Weak | pCS |
| CB7·2a  | 1         | [O2]7···HeC5 | 153.2                              | 2.400           | 9.7         | 36.7                | -5.6     | 1.8      | 5.4      | Weak | Weak | pCS |
| CB7·2a  | 2         | [N6]2···HaC2 | 117.1                              | 3.550           | 1.4         | 5.1                 | -0.6     | 0.3      | 1.8      | Weak | Weak | pCS |
| CB7·2a  | 2         | [O1]3···HC3' | 134.8                              | 2.660           | 5.8         | 21.0                | -3.2     | 1.0      | 3.7      | Weak | Weak | pCS |
| CB7·2a  | 2         | [O1]4···HC3' | 119.9                              | 2.631           | 6.8         | 25.4                | -3.8     | 1.3      | 4.1      | Weak | Weak | pCS |
| CB7·2a  | 2         | [O1]6···HC5' | 111.6                              | 2.674           | 6.8         | 25.7                | -3.8     | 1.3      | 4.1      | Weak | Weak | pCS |
| CB7·2a  | 2         | [O1]7···HC5' | 142.4                              | 2.549           | 7.1         | 26.3                | -4.0     | 1.3      | 4.2      | Weak | Weak | pCS |
| CB7·2a  | 2         | [O2]1···HaC2 | 120.7                              | 2.985           | 4.2         | 16.0                | -2.2     | 0.9      | 3.0      | Weak | Weak | pCS |
| CB7·2a  | 2         | [O2]2···HeC3 | 158.0                              | 2.372           | 10.2        | 38.9                | -5.9     | 1.9      | 5.7      | Weak | Weak | pCS |

| Complex | Conformer | Bond                | $\angle(\text{X-H}\cdots\text{X})$ | $d(\text{\AA})$ | $\rho(r_c)$ | $\nabla^2\rho(r_c)$ | $V(r_c)$ | $H(r_c)$ | $E(r_c)$ | GC   | EC   | HC  |
|---------|-----------|---------------------|------------------------------------|-----------------|-------------|---------------------|----------|----------|----------|------|------|-----|
| CB7·2a  | 2         | [O2]3 $\cdots$ HaC3 | 104.6                              | 2.756           | 6.3         | 25.3                | -3.6     | 1.3      | 4.0      | Weak | Weak | pCS |
| CB7·2a  | 2         | [O2]4 $\cdots$ HaC3 | 161.1                              | 2.557           | 7.3         | 25.5                | -4.0     | 1.2      | 4.2      | Weak | Weak | pCS |
| CB7·2a  | 2         | [O2]4 $\cdots$ HaC5 | 148.1                              | 2.889           | 3.8         | 12.8                | -1.9     | 0.6      | 2.8      | Weak | Weak | pCS |
| CB7·2a  | 2         | [O2]5 $\cdots$ HaC5 | 121.4                              | 2.625           | 6.9         | 25.4                | -3.8     | 1.2      | 4.2      | Weak | Weak | pCS |
| CB7·2a  | 2         | [O2]6 $\cdots$ HeC5 | 142.0                              | 2.529           | 7.4         | 27.7                | -4.1     | 1.4      | 4.4      | Weak | Weak | pCS |
| CB7·2a  | 2         | [O2]7 $\cdots$ HaC6 | 118.7                              | 3.028           | 3.9         | 15.4                | -2.1     | 0.9      | 2.9      | Weak | Weak | pCS |
| CB7·2a  | 2         | [O2]7 $\cdots$ HeC5 | 123.6                              | 2.670           | 6.2         | 22.7                | -3.4     | 1.1      | 3.9      | Weak | Weak | pCS |

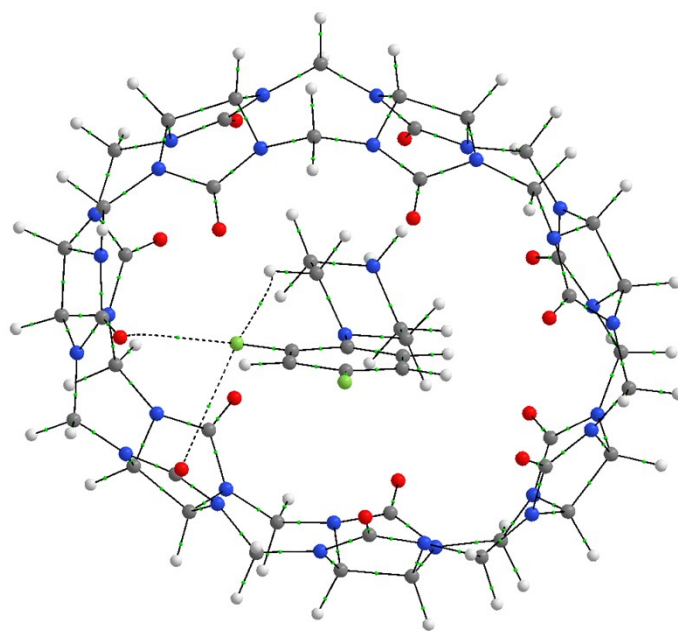

**Fig. S18** Molecular graph for CB7·1h conformer 1. Dashed lines indicate a fluorine interaction. The small green dots indicate the bond critical points. White atoms are hydrogen, gray atoms are carbon, red atoms are oxygen, blue atoms are nitrogen, and green atoms are fluorine.



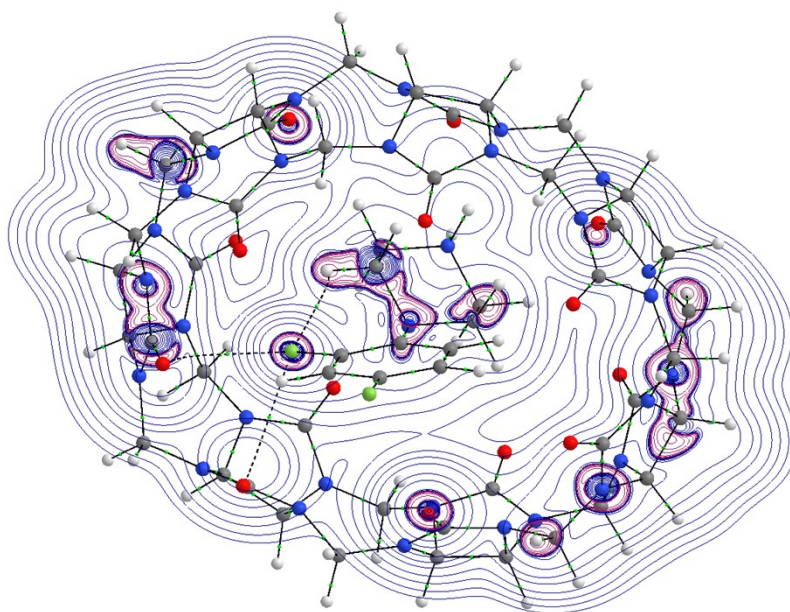

**Fig. S19** Contour plot of the Laplacian of the electron density for CB7·1h conformer 1. The selected plane is formed between those atoms that belong to the intramolecular bond C2H...FC2'. Regions of charge-concentration and charge-depletion are respectively solid lines in red,  $\nabla^2\rho(r_c) < 0$ , and solid lines in blue,  $\nabla^2\rho(r_c) > 0$ . Bond paths between each atom pair of two nuclei painted in solid and dashed lines in atom color represent the shared- and closed-shell interactions, respectively, whereas the tiny spheres painted in green represent bond critical points.

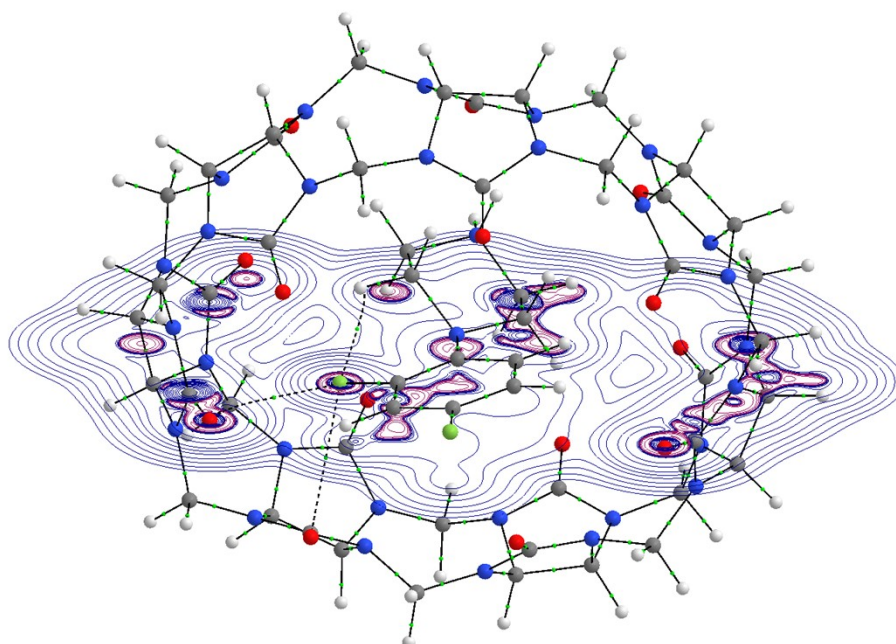

**Fig. S20** Contour plot of the Laplacian of the electron density for CB7·1h conformer 1. The selected plane is formed between those atoms that belong to the intramolecular bond [O1]3...FC2'. Regions of

charge-concentration and charge-depletion are respectively solid lines in red,  $\nabla^2\rho(r_c) < 0$ , and solid lines in blue,  $\nabla^2\rho(r_c) > 0$ . Bond paths between each atom pair of two nuclei painted in solid and dashed lines in atom color represent the shared- and closed-shell interactions, respectively, whereas the tiny spheres painted in green represent bond critical points.

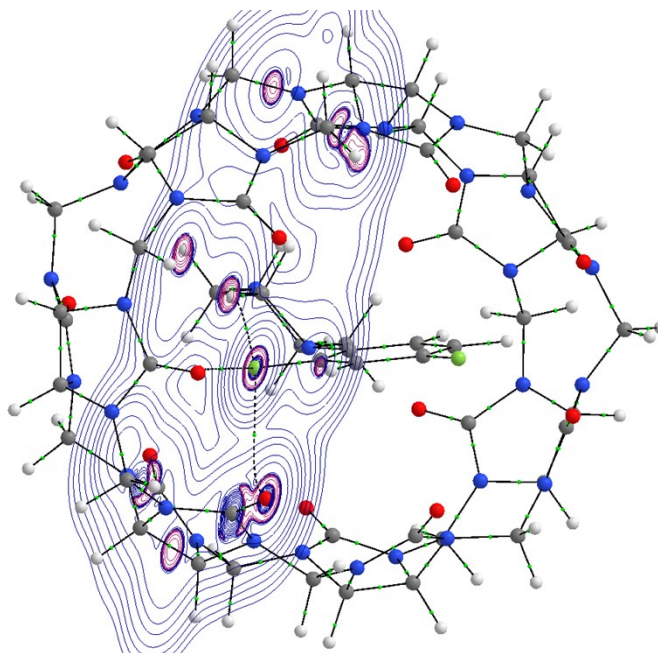

**Fig. S21** Contour plot of the Laplacian of the electron density for CB7·1h conformer 1. The selected plane is formed between those atoms that belong to the intramolecular bond [O1]4··FC2'. Regions of charge-concentration and charge-depletion are respectively solid lines in red,  $\nabla^2\rho(r_c) < 0$ , and solid lines in blue,  $\nabla^2\rho(r_c) > 0$ . Bond paths between each atom pair of two nuclei painted in solid and dashed lines in atom color represent the shared- and closed-shell interactions, respectively, whereas the tiny spheres painted in green represent bond critical points.

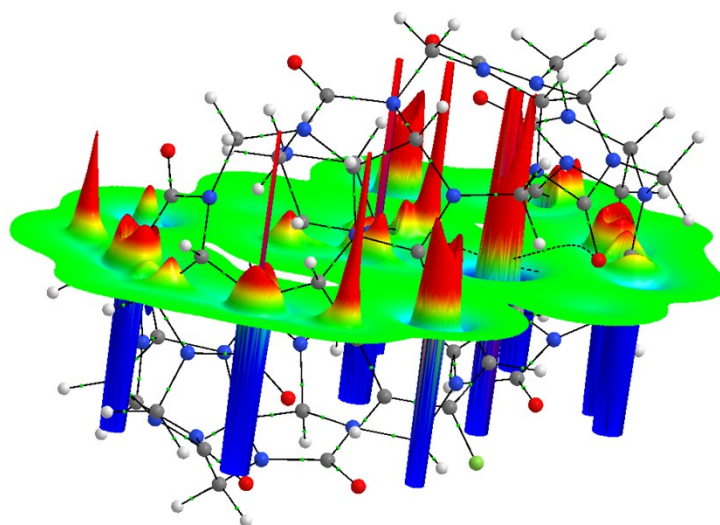

**Fig. S22** Relief maps of the Laplacian of the density for conformer 1 of CB7·**1h** conformer 1. The selected plane is formed between those atoms that belong to the intramolecular bond C2H...FC2'. The color ranges are: blue, more positive than 1; cyan, between 1 and 0.5; green, between -0.5 and 0.5; yellow, between -1 and -0.5; red, more negative than -1 au.

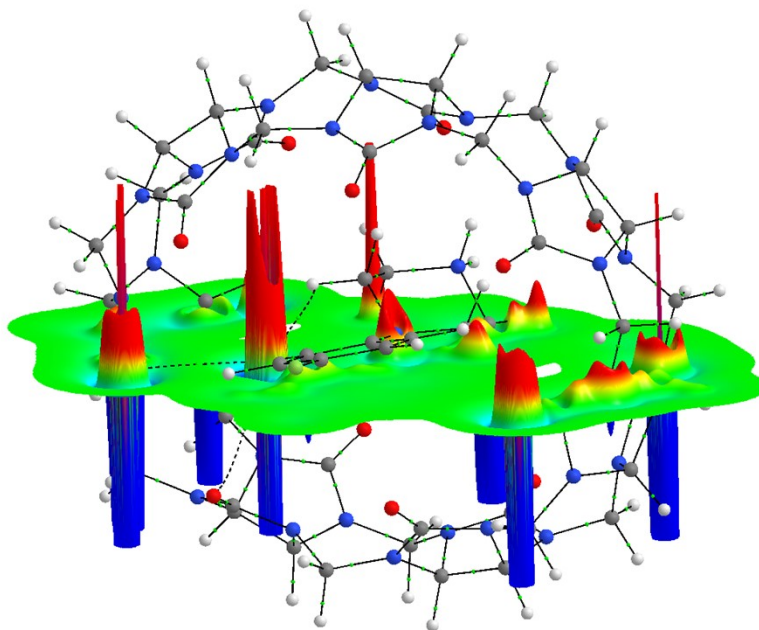

**Fig. S23** Relief maps of the Laplacian of the density for conformer 1 of CB7·1h conformer 1. The selected plane is formed between those atoms that belong to the intramolecular bond [O1]3···FC2'. The color ranges are: blue, more positive than 1; cyan, between 1 and 0.5; green, between -0.5 and 0.5; yellow, between -1 and -0.5; red, more negative than -1 au.

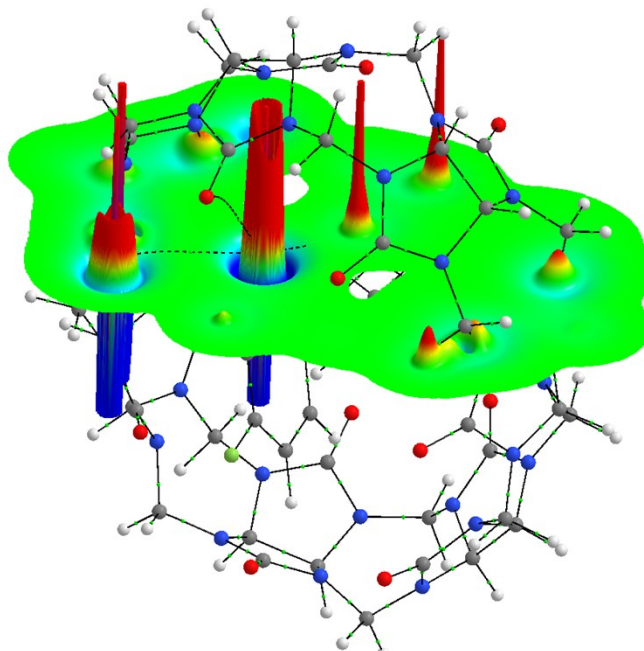

**Fig. S24** Relief maps of the Laplacian of the density for conformer 1 of CB7·1h conformer 1. The selected plane is formed between those atoms that belong to the intramolecular bond [O1]4···FC2'. The color ranges are: blue, more positive than 1; cyan, between 1 and 0.5; green, between -0.5 and 0.5; yellow, between -1 and -0.5; red, more negative than -1 au.

**Table S10** Geometrical parameters, QTAIM properties at the bond critical points (in a.u.  $\times 10^3$ ),  $E(r_c)$  is in kJ/mol, and classification of  $n \rightarrow \pi^*$  interactions. EC corresponds to energy classification and HC stands for Hayashi classification. The number in square brackets corresponds to the glycolurill unit in CB7·

| Complex | Conformer | Bond        | $d(\text{\AA})$ | $\rho(r_c)$ | $\nabla^2\rho(r_c)$ | $V(r_c)$ | $H(r_c)$ | $E(r_c)$ | EC   | HC  |
|---------|-----------|-------------|-----------------|-------------|---------------------|----------|----------|----------|------|-----|
| CB7·1a  | 1         | [O1]1···C5' | 3.471           | 3.8         | 12.3                | -1.7     | 0.7      | 2.6      | Weak | pCS |
| CB7·1a  | 1         | [O1]2···C3' | 3.472           | 3.8         | 12.3                | -1.7     | 0.7      | 2.6      | Weak | pCS |
| CB7·1a  | 1         | [O1]5···C1' | 3.706           | 2.9         | 9.9                 | -1.3     | 0.6      | 2.4      | Weak | pCS |
| CB7·1a  | 2         | [N8]1···C6' | 4.621           | 0.7         | 2.1                 | -0.2     | 0.1      | 1.6      | Weak | pCS |
| CB7·1a  | 2         | [O1]1···C4' | 3.796           | 2.3         | 6.6                 | -0.9     | 0.4      | 2.1      | Weak | pCS |
| CB7·1a  | 2         | [O1]4···C3' | 3.324           | 4.9         | 16.9                | -2.4     | 0.9      | 3.1      | Weak | pCS |
| CB7·1a  | 2         | [O1]5···C5' | 3.345           | 4.8         | 16.3                | -2.3     | 0.9      | 3.0      | Weak | pCS |
| CB7·1b  | -         | [O1]1···C5' | 3.440           | 4.0         | 14.6                | -2.0     | 0.8      | 2.8      | Weak | pCS |
| CB7·1b  | -         | [O1]2···C3' | 3.554           | 3.5         | 11.8                | -1.6     | 0.7      | 2.6      | Weak | pCS |

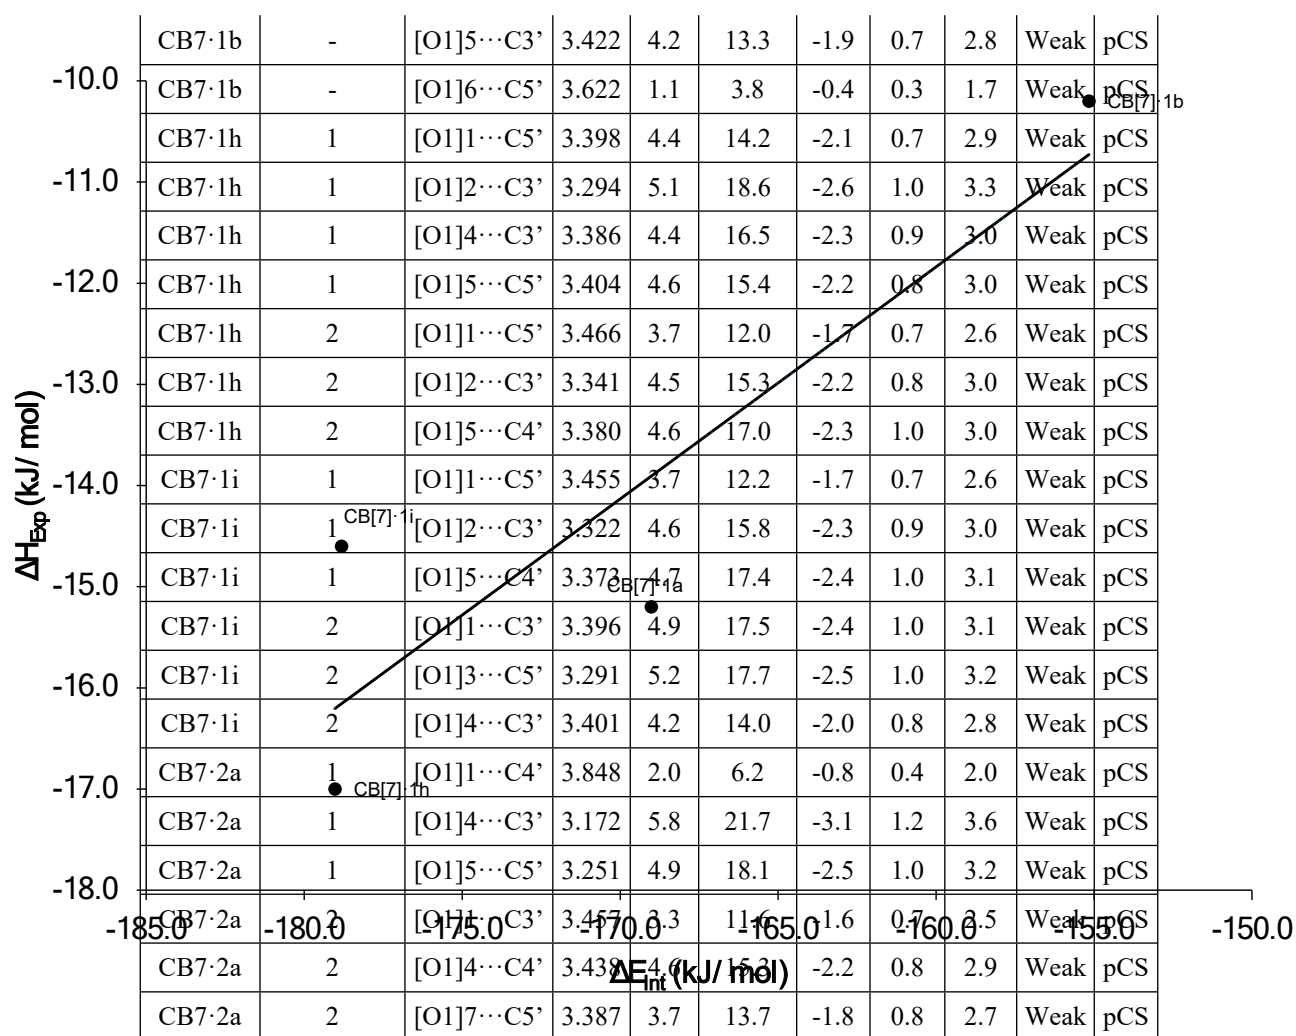

Fig. S25

Experimental enthalpy energy (Table 2) versus interaction energy. The equation for the adjusted tendency (Continuous line) is  $y = 0.2295x + 24.8810$  and  $R^2 = 0.80$ .



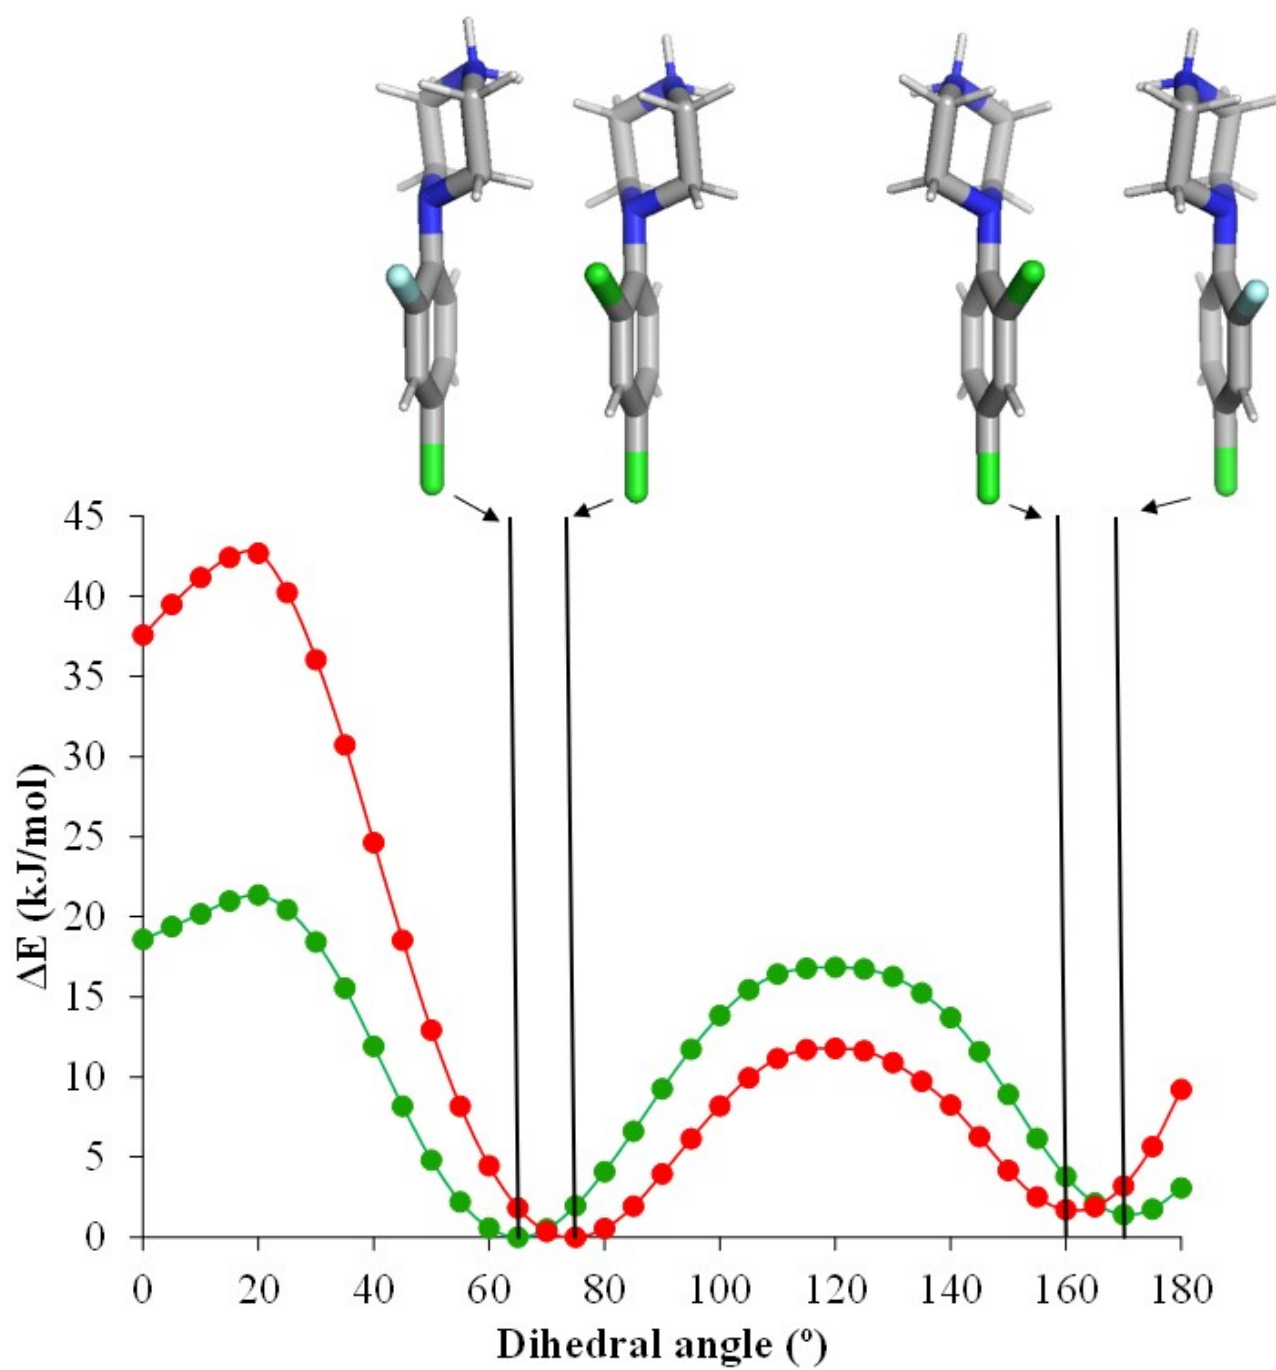

**Fig. S26** Potential energy surfaces for the dihedral angle C2'-C1'-N1-C1 are shown for 1i in (●) and 1j in (●) with the structures at the minima overlaid.
